# Supplementary material for: Dehydrogenative Heck coupling of biologically relevant N-heteroarenes with alkenes: discovery of fluorescent core frameworks
Source: Royal Society of Chemistry journal article supplement (doi:10.1039/c2cc17557f), 2012-01-01

## *Supporting Information*

# **Dehydrogenative Heck coupling of biologically relevant N-heteroarenes with alkenes: discovery of fluorescent core frameworks**

*Yumin Huang, Feijie Song, Zhen Wang, Peihua Xi, Ningjie Wu, Zhigang Wang,  
Jingbo Lan and Jingsong You\**

Key Laboratory of Green Chemistry and Technology of Ministry of Education,  
College of Chemistry, and State Key Laboratory of Biotherapy, West China Hospital,  
West China Medical School, Sichuan University, 29 Wangjiang Road, Chengdu  
610064, PR China Fax: 86-28-85412203; E-mail: jsyou@scu.edu.cn

### **Table of contents**

|                                                                                                                                    |     |
|------------------------------------------------------------------------------------------------------------------------------------|-----|
| I. General remarks.....                                                                                                            | S1  |
| II. Optimization of the coupling reaction of caffeine <b>1a</b> with <i>n</i> -butyl acrylate <b>2a</b> .....                      | S2  |
| III. General procedure for the Pd/Cu co-catalyzed dehydrogenative Heck coupling reaction.....                                      | S3  |
| IV. Characterization of compounds <b>3a-3i</b> , <b>4a-4m</b> , <b>CSC</b> and <b>KW6002</b> .....                                 | S3  |
| V. Absorption and fluorescence emission data of compounds <b>3a-3i</b> and <b>4a-4m</b> .....                                      | S18 |
| VI. Cell culture experiments, imaging of living-cells and cytotoxicity assays.....                                                 | S19 |
| VII. References.....                                                                                                               | S20 |
| VIII. <sup>1</sup> H and <sup>13</sup> C NMR spectra of compounds <b>3a-3i</b> , <b>4a-4m</b> , <b>CSC</b> and <b>KW6002</b> ..... | S22 |

## I. General Remarks

NMR spectra were obtained on a Bruker AMX-400 or a Bruker AMX-600. The  $^1\text{H}$  NMR (400 MHz or 600 MHz) chemical shifts were measured using  $\text{CDCl}_3$  or  $\text{DMSO-}d_6$  as the internal reference ( $\text{CDCl}_3$ :  $\delta = 7.26$  ppm;  $\text{DMSO-}d_6$ :  $\delta = 2.50$  ppm). The  $^{13}\text{C}$  NMR (100 MHz) chemical shifts are given using  $\text{CDCl}_3$  or  $\text{DMSO-}d_6$  as the internal standard ( $\text{CDCl}_3$ :  $\delta = 77.16$  ppm;  $\text{DMSO-}d_6$ :  $\delta = 39.52$  ppm). Low-resolution mass spectra (MS) were obtained by ESI-MS. High-resolution mass spectra (HR-MS) were obtained with a Waters-Q-TOF-Premier (ESI). Melting points were determined with XRC-1 and are uncorrected. Absorption spectra were obtained on a HITACHI U-2910 spectrometer. Fluorescence spectra were collected on a Horiba Jobin Yvon-Edison Fluoromax-4 fluorescence spectrometer. The photomultiplier voltage was 700 V. To reduce the fluctuation in the excitation intensity, the lamp was kept on for 1 hour prior to the experiment.

Unless otherwise noted, all reagents were obtained from commercial suppliers and used without further purification. 1-Benzyl-3,7-dimethylxanthine, 7-butyl-1,3-dimethylxanthine, 1-allyl-3,7-dimethylxanthine,<sup>1</sup> 1,3-diethyl-7-methyl-1*H*-purine-2,6-(3*H*,7*H*)-dione,<sup>2</sup> other purine derivatives,<sup>3</sup> and indolizine<sup>4</sup> were prepared according to the literature procedures. Pyridine was dried over  $\text{CaH}_2$  and freshly distilled prior to use. All solvents were purified and dried according to standard methods prior to use. Unless otherwise indicated, all reactions were carried out under  $\text{N}_2$  atmosphere.

## II. Optimization of the coupling reaction of caffeine 1a with *n*-butyl acrylate 2a

**Table S1** Optimization results of the coupling reaction of caffeine **1a** with *n*-butyl acrylate **2a**<sup>a</sup>

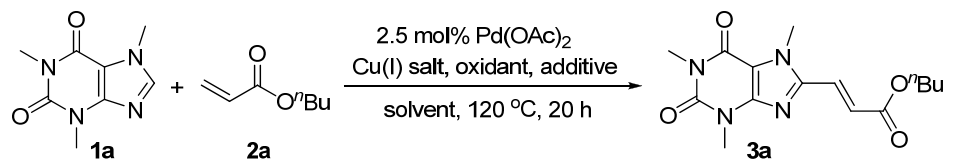

| Entry | Oxidant                                            | Cu(I) salts | Additive | Solvent | Yield (%) <sup>b</sup> |
|-------|----------------------------------------------------|-------------|----------|---------|------------------------|
| 1     | $\text{Cu}(\text{OAc})_2 \cdot \text{H}_2\text{O}$ | —           | pyridine | DMA     | 29                     |

|    |                                        |                |                   |         |                 |
|----|----------------------------------------|----------------|-------------------|---------|-----------------|
| 2  | Cu(OAc) <sub>2</sub> ·H <sub>2</sub> O | CuBr (10 mol%) | pyridine          | DMA     | 57              |
| 3  | Cu(OAc) <sub>2</sub> ·H <sub>2</sub> O | CuI (10 mol%)  | pyridine          | DMA     | 36              |
| 4  | Cu(OAc) <sub>2</sub> ·H <sub>2</sub> O | CuCl (10 mol%) | pyridine          | DMA     | 67              |
| 5  | Cu(OAc) <sub>2</sub> ·H <sub>2</sub> O | CuCl (13 mol%) | pyridine          | DMA     | 75              |
| 6  | Cu(OAc) <sub>2</sub> ·H <sub>2</sub> O | CuCl (15 mol%) | pyridine          | DMA     | 81              |
| 7  | Cu(OAc) <sub>2</sub> ·H <sub>2</sub> O | CuCl (20 mol%) | pyridine          | DMA     | 71              |
| 8  | Cu(OAc) <sub>2</sub> ·H <sub>2</sub> O | CuCl (10 mol%) | pyridine          | DMF     | 62              |
| 9  | Cu(OAc) <sub>2</sub> ·H <sub>2</sub> O | CuCl (10 mol%) | pyridine          | NMP     | 61              |
| 10 | Cu(OAc) <sub>2</sub> ·H <sub>2</sub> O | CuCl (10 mol%) | pyridine          | DMSO    | 32              |
| 11 | Cu(OAc) <sub>2</sub> ·H <sub>2</sub> O | CuCl (10 mol%) | pyridine          | dioxane | 13              |
| 12 | Cu(OAc) <sub>2</sub> ·H <sub>2</sub> O | CuCl (10 mol%) | —                 | DMA     | 30              |
| 13 | Cu(OAc) <sub>2</sub> ·H <sub>2</sub> O | CuCl (10 mol%) | Et <sub>3</sub> N | DMA     | 18              |
| 14 | Cu(OAc) <sub>2</sub> ·H <sub>2</sub> O | CuCl (10 mol%) | DABCO             | DMA     | 23              |
| 15 | Cu(OAc) <sub>2</sub> ·H <sub>2</sub> O | CuCl (10 mol%) | 2,6-lutidine      | DMA     | 19              |
| 16 | Cu(OAc) <sub>2</sub> ·H <sub>2</sub> O | CuCl (10 mol%) | KOAc              | DMA     | 57              |
| 17 | Cu(OAc) <sub>2</sub> ·H <sub>2</sub> O | CuCl (13 mol%) | pyridine          | DMA     | 67 <sup>c</sup> |
| 18 | Cu(OAc) <sub>2</sub> ·H <sub>2</sub> O | CuCl (15 mol%) | pyridine          | DMA     | 74 <sup>d</sup> |
| 19 | Cu(acac) <sub>2</sub>                  | CuCl (13 mol%) | pyridine          | DMA     | trace           |
| 20 | Ag <sub>2</sub> CO <sub>3</sub>        | CuCl (13 mol%) | pyridine          | DMA     | 26              |

<sup>a</sup> The reactions were carried out using caffeine **1** (0.5 mmol), *n*-butyl acrylate **2a** (3.0 mmol), oxidant (0.75 mmol), additive (0.5 mmol), Cu(I) salt and Pd(OAc)<sub>2</sub> (0.0125 mmol, 2.5 mol%) in a 0.6 M solution. <sup>b</sup> Isolated yield. <sup>c</sup> *n*-Butyl acrylate **2a** (1.5 mmol) was used. <sup>d</sup> Cu(OAc)<sub>2</sub>·H<sub>2</sub>O (1.0 mmol) was used.

**Table S2** Optimization of palladium sources<sup>a</sup>

Reaction scheme: Caffeine (**1**) + *n*-butyl acrylate (**2a**)  $\xrightarrow[\text{DMA, 120 } ^\circ\text{C, 20 h}]{\text{palladium (II) 1.5 equiv Cu(OAc)}_2 \cdot \text{H}_2\text{O, 10 mol\% CuCl, 1 equiv pyridine}}$  Caffeine derivative (**3a**)

| Entry | Palladium source     | Yield (%) <sup>b</sup> |
|-------|----------------------|------------------------|
| 1     | PdCl <sub>2</sub>    | 68 <sup>c</sup>        |
| 2     | Pd(OAc) <sub>2</sub> | 67                     |
| 3     | Pd(OAc) <sub>2</sub> | 75 <sup>c</sup>        |
| 4     | Pd(OAc) <sub>2</sub> | 81 <sup>d</sup>        |
| 5     | Pd(OAc) <sub>2</sub> | 84 <sup>c,e</sup>      |

|    |                                                    |                 |
|----|----------------------------------------------------|-----------------|
| 6  | Pd(acac) <sub>2</sub>                              | 81 <sup>d</sup> |
| 7  | Pd(dppf)Cl <sub>2</sub>                            | 76 <sup>d</sup> |
| 8  | Pd(PPh <sub>3</sub> ) <sub>2</sub> Cl <sub>2</sub> | 64              |
| 9  | Pd(PhCN) <sub>2</sub> Cl <sub>2</sub>              | 66              |
| 10 | Pd(MeCN) <sub>2</sub> Cl <sub>2</sub>              | 64              |

<sup>a</sup> Reactions were carried out using caffeine (0.5 mmol), palladium source (2.5 mol%), *n*-butyl acrylate **2a** (3.0 mmol), Cu(OAc)<sub>2</sub>·H<sub>2</sub>O (0.75 mmol), CuCl (10 mol%) and pyridine (0.5 mmol) in a 0.6 M DMA solution for 20 h at 120 °C. <sup>b</sup> Isolated yield. <sup>c</sup> 13 mol% CuCl was used. <sup>d</sup> 15 mol% CuCl was used. <sup>e</sup> 10 mol% Pd(OAc)<sub>2</sub> was used.

### III. General procedure for the Pd/Cu co-catalyzed dehydrogenative Heck coupling reaction

A flame-dried Schlenk tube with a magnetic stirring bar was charged with Pd(OAc)<sub>2</sub> (2.8 mg, 0.0125 mmol), Cu(OAc)<sub>2</sub>·H<sub>2</sub>O (150 mg, 0.75 mmol), CuCl (7.4 mg, 0.075 mmol), N-heterocycles (0.5 mmol), pyridine (39.6 mg, 0.5 mmol) and N,N-dimethylacetamide (0.6 mL) under N<sub>2</sub>. After the mixture was stirred at room temperature for 5 min, alkene (3.0 mmol) was added. The resulting mixture was heated at 120 °C for 20 h and then cooled to ambient temperature. The solvent was evaporated and the residue was diluted with 30 mL CH<sub>2</sub>Cl<sub>2</sub>, filtered through a Celite pad, and washed with CH<sub>2</sub>Cl<sub>2</sub> (10-20 mL). The combined organic phases were concentrated and the resulting residue was purified by column chromatography on silica gel to provide the desired product.

### IV. Characterization of compounds 3a-3i, 4a-4m, CSC and KW6002

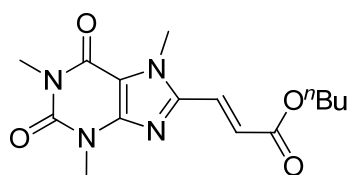

#### (*E*)-Butyl 3-(1,3,7-trimethyl-xanthine-8-yl) acrylate (**3a**)

Pd(OAc)<sub>2</sub> (2.8 mg, 0.0125 mmol), Cu(OAc)<sub>2</sub>·H<sub>2</sub>O (150 mg, 0.75 mmol), CuCl (7.4 mg, 0.075 mmol), caffeine (97.1 mg, 0.5 mmol), *n*-butyl acrylate (384.5 mg, 3.0 mmol), pyridine (39.6 mg, 0.5 mmol) and N,N-dimethylacetamide (0.6 mL) at 120 °C for 20 h. Purification via silica gel column chromatography (CH<sub>2</sub>Cl<sub>2</sub>/petroleum

ether/acetone = 4/6/1, v/v) afforded the desired product as a pale yellow solid (81% yield). M.p.: 161-163 °C; <sup>1</sup>H NMR (400 MHz, CDCl<sub>3</sub>): δ = 0.97 (t, *J* = 7.6 Hz, 3H), 1.41-1.47 (m, 2H), 1.68-1.72 (m, 2H), 3.42 (s, 3H), 3.59 (s, 3H), 4.09 (s, 3H), 4.25 (t, *J* = 6.4 Hz, 2H), 7.03 (d, *J* = 15.6 Hz, 1H), 7.51 (d, *J* = 15.6 Hz, 1H) ppm. <sup>13</sup>C NMR (100 MHz, CDCl<sub>3</sub>): δ = 13.8, 19.2, 28.1, 29.8, 30.8, 32.0, 65.2, 109.3, 126.5, 126.5, 146.9, 148.5, 151.6, 155.4, 166.1 ppm. HRMS (ESI): calcd for C<sub>15</sub>H<sub>21</sub>N<sub>4</sub>O<sub>4</sub> [M+H]<sup>+</sup> 321.1563, found 321.1508.

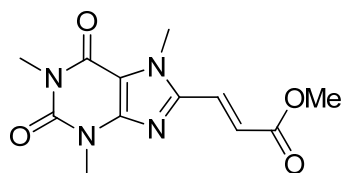

**(E)-Methyl 3-(1,3,7-trimethyl-xanthine-8-yl) acrylate (3b)**

Pd(OAc)<sub>2</sub> (2.8 mg, 0.0125 mmol), Cu(OAc)<sub>2</sub>·H<sub>2</sub>O (150 mg, 0.75 mmol), CuCl ( 7.4 mg, 0.075 mmol), caffeine (97.1 mg, 0.5 mmol), methyl acrylate (387.4 mg, 4.5 mmol), pyridine (39.6 mg, 0.5 mmol) and N,N-dimethylacetamide (0.6 mL) at 120 °C for 20 h. Purification via silica gel column chromatography (CH<sub>2</sub>Cl<sub>2</sub>/petroleum ether/acetone = 15/15/2, v/v) afforded the desired product as a pale yellow solid (66% yield). M.p.: 235-238 °C; <sup>1</sup>H NMR (400 MHz, CDCl<sub>3</sub>): δ = 3.41 (s, 3H), 3.59 (s, 3H), 3.85 (s, 3H), 4.09 (s, 3H), 7.02 (d, *J* = 15.2 Hz, 1H), 7.51 (d, *J* = 15.2 Hz, 1H) ppm; <sup>13</sup>C NMR (100 MHz, CDCl<sub>3</sub>): δ = 28.1, 29.9, 32.0, 52.3, 109.4, 125.9, 126.7, 146.7, 148.5, 151.6, 155.4, 166.4 ppm; HRMS (ESI): calcd for C<sub>12</sub>H<sub>15</sub>N<sub>4</sub>O<sub>4</sub> [M+H]<sup>+</sup> 279.1093, found 279.1153.

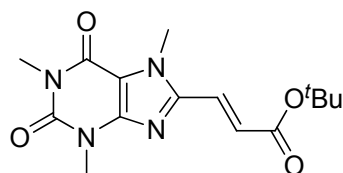

**(E)-tert-Butyl 3-(1,3,7-trimethyl-xanthine-8-yl) acrylate (3c)**

Pd(OAc)<sub>2</sub> (2.8 mg, 0.0125 mmol), Cu(OAc)<sub>2</sub>·H<sub>2</sub>O (150 mg, 0.75 mmol), CuCl ( 7.4

mg, 0.075 mmol), caffeine (97.1 mg, 0.5 mmol), *tert*-butyl acrylate (384.5 mg, 3 mmol), pyridine (39.6 mg, 0.5 mmol) and *N,N*-dimethylacetamide (0.6 mL) at 120 °C for 20 h. Purification via silica gel column chromatography (petroleum ether/CH<sub>2</sub>Cl<sub>2</sub>/acetone = 8/1/0.4-6/1/0.4, v/v) afforded the desired product as a pale yellow solid (62% yield). M.p.: 214-216 °C; <sup>1</sup>H NMR (400 MHz, CDCl<sub>3</sub>): δ = 1.53 (s, 9H), 3.40 (s, 3H), 3.57 (s, 3H), 4.06 (s, 3H), 6.96 (d, *J* = 15.6 Hz, 1H), 7.41 (d, *J* = 15.6 Hz, 1H) ppm. <sup>13</sup>C NMR (100 MHz, CDCl<sub>3</sub>): δ = 28.1, 28.2, 29.8, 31.9, 81.7, 109.2, 125.6, 128.6, 147.2, 148.5, 151.7, 155.4, 165.2 ppm. HRMS (ESI): calcd for C<sub>15</sub>H<sub>21</sub>N<sub>4</sub>O<sub>4</sub> [M+H]<sup>+</sup> 321.1563, found 321.1566.

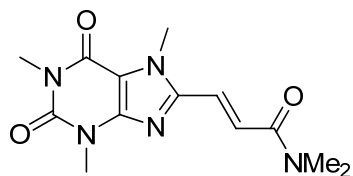

**(*E*)-*N,N*-Dimethyl-3-(1,3,7-trimethyl-xanthine-8-yl) acrylamide (3d)**

Pd(OAc)<sub>2</sub> (2.8 mg, 0.0125 mmol), Cu(OAc)<sub>2</sub>·H<sub>2</sub>O (150 mg, 0.75 mmol), CuCl ( 7.4 mg, 0.075 mmol), caffeine (97.1 mg, 0.5 mmol), *N,N*-dimethylacrylamide (297.4 mg, 3 mmol), pyridine (39.6 mg, 0.5 mmol) and *N,N*-dimethylacetamide (0.6 mL) at 120 °C for 20 h. Purification via silica gel column chromatography (CH<sub>2</sub>Cl<sub>2</sub>/petroleum ether/acetone = 2/2/1, v/v) afforded the desired product as a pale yellow solid (84% yield). M.p.: 270-273 °C; <sup>1</sup>H NMR (400 MHz, CDCl<sub>3</sub>): δ = 3.09 (s, 3H), 3.23 (s, 3H), 3.40 (s, 3H), 3.59 (s, 3H), 4.07 (s, 3H), 7.54 (s, 2H) ppm; <sup>13</sup>C NMR (100 MHz, CDCl<sub>3</sub>): δ = 28.1, 29.9, 31.9, 36.2, 37.6, 109.0, 124.7, 125.5, 147.8, 148.4, 151.7, 155.3, 165.2 ppm; HRMS (ESI): calcd for C<sub>13</sub>H<sub>18</sub>N<sub>5</sub>O<sub>3</sub> [M+H]<sup>+</sup> 292.1410, found 292.1400.

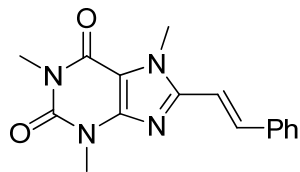

**(E)-1,3,7-Trimethyl-8-styryl-xanthine (3e)**

Pd(OAc)<sub>2</sub> (2.8 mg, 0.0125 mmol), Cu(OAc)<sub>2</sub>·H<sub>2</sub>O (150 mg, 0.75 mmol), CuCl (7.4 mg, 0.075 mmol), caffeine (97.1 mg, 0.5 mmol), styrene (312.4 mg, 3 mmol), pyridine (39.6 mg, 0.5 mmol) and N,N-dimethylacetamide (0.6 mL) at 120 °C for 20 h. Purification via silica gel column chromatography (CH<sub>2</sub>Cl<sub>2</sub>/petroleum ether/acetone = 10/15/2, v/v) afforded the desired product as a white solid (68% yield). M.p.: 214-217 °C; <sup>1</sup>H NMR (400 MHz, CDCl<sub>3</sub>): δ = 3.40 (s, 3H), 3.62 (s, 3H), 4.06 (s, 3H), 6.91 (d, *J* = 15.6 Hz, 1H), 7.36-7.42 (m, 3H), 7.57 (d, *J* = 7.2 Hz, 2H), 7.80 (d, *J* = 15.6 Hz, 1H) ppm; <sup>13</sup>C NMR (100 MHz, CDCl<sub>3</sub>): δ = 28.0, 29.8, 31.6, 107.9, 111.2, 127.4, 129.0, 129.6, 135.5, 138.3, 148.6, 150.0, 151.7, 155.2 ppm; HRMS (ESI): calcd for C<sub>16</sub>H<sub>17</sub>N<sub>4</sub>O<sub>2</sub> [M+H]<sup>+</sup> 297.1352, found 297.1361.

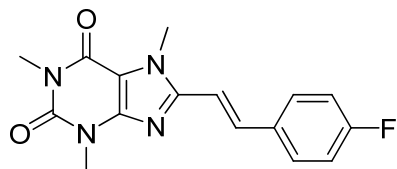

**(E)-1,3,7-Trimethyl-8-(4-fluorostyryl)-xanthine (3f)**

Pd(OAc)<sub>2</sub> (2.8 mg, 0.0125 mmol), Cu(OAc)<sub>2</sub>·H<sub>2</sub>O (150 mg, 0.75 mmol), CuCl (7.4 mg, 0.075 mmol), caffeine (97.1 mg, 0.5 mmol), 4-fluorostyrene (366.4 mg, 3 mmol), pyridine (39.6 mg, 0.5 mmol) and N,N-dimethylacetamide (0.6 mL) at 120 °C for 20 h. Purification via silica gel column chromatography (petroleum ether/CH<sub>2</sub>Cl<sub>2</sub>/acetone = 8/1/0.4-6/1/0.4, v/v) afforded the desired product as a pale yellow solid (82% yield). M.p.: 238-240 °C; <sup>1</sup>H NMR (400 MHz, CDCl<sub>3</sub>): δ = 3.41 (s, 3H), 3.62 (s, 3H), 4.06 (s, 3H), 6.83 (d, *J* = 15.6 Hz, 1H), 7.10 (t, *J* = 8.8 Hz, 2H), 7.56 (dd, *J* = 5.6, 8.4 Hz, 2H), 7.76 (d, *J* = 15.6 Hz, 1H) ppm. <sup>13</sup>C NMR (100 MHz, CDCl<sub>3</sub>): δ = 28.1, 29.9,

31.6, 111.1, 116.1, 116.3, 129.2, 129.3, 131.9, 137.2, 148.7, 149.9, 151.8, 155.4 ppm.  
HRMS (ESI): calcd for C<sub>16</sub>H<sub>16</sub>N<sub>4</sub>O<sub>2</sub>F [M+H]<sup>+</sup> 315.1257, found 315.1255.

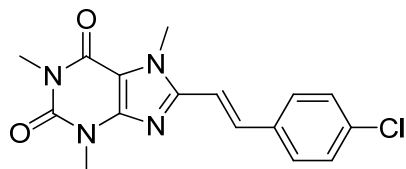

**(E)-1,3,7-Trimethyl-8-(4-chlorostyryl)-xanthine (3g)**

Pd(OAc)<sub>2</sub> (2.8 mg, 0.0125 mmol), Cu(OAc)<sub>2</sub>·H<sub>2</sub>O (150 mg, 0.75 mmol), CuCl ( 7.4 mg, 0.075 mmol), caffeine (97.1 mg, 0.5 mmol), 4-chlorostyrene (415.8 mg, 3 mmol), pyridine (39.6 mg, 0.5 mmol) and N,N-dimethylacetamide (0.6 mL) at 120 °C for 20 h. Purification via silica gel column chromatography (petroleum ether/CH<sub>2</sub>Cl<sub>2</sub>/acetone = 8/1/0.4-6/1/0.4, v/v) afforded the desired product as a pale yellow solid (70% yield). M.p.: 224-226 °C; <sup>1</sup>H NMR (400 MHz, CDCl<sub>3</sub>): δ = 3.41 (s, 3H), 3.62 (s, 3H), 4.07 (s, 3H), 6.89 (d, *J* = 15.6 Hz, 1H), 7.38 (d, *J* = 8.4 Hz, 2H), 7.51 (d, *J* = 8.0 Hz, 2H), 7.75 (d, *J* = 15.6 Hz, 1H) ppm. <sup>13</sup>C NMR (100 MHz, CDCl<sub>3</sub>): δ = 28.0, 29.9, 31.6, 108.1, 111.8, 128.6., 129.3, 134.1, 135.4, 136.9, 148.6, 149.7, 151.8, 155.3 ppm. HRMS (ESI): calcd for C<sub>16</sub>H<sub>16</sub>N<sub>4</sub>O<sub>2</sub>Cl [M+H]<sup>+</sup> 331.0962, found 331.0965.

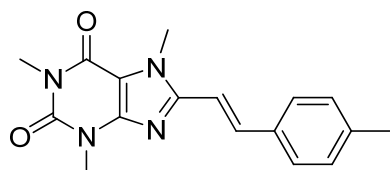

**(E)-1,3,7-Trimethyl-8-(4-methylstyryl)-xanthine (3h)**

Pd(OAc)<sub>2</sub> (2.8 mg, 0.0125 mmol), Cu(OAc)<sub>2</sub>·H<sub>2</sub>O (150 mg, 0.75 mmol), CuCl ( 7.4 mg, 0.075 mmol), caffeine (97.1 mg, 0.5 mmol), 4-methylstyrene (354.5 mg, 3 mmol), pyridine (39.6 mg, 0.5 mmol) and N,N-dimethylacetamide (0.6 mL) at 120 °C for 20 h. Purification via silica gel column chromatography (petroleum



ether/CH<sub>2</sub>Cl<sub>2</sub>/acetone = 8/1/0.4-6/1/0.4, v/v) afforded the desired product as a pale yellow solid (62% yield). M.p.: 199-201 °C; <sup>1</sup>H NMR (400 MHz, CDCl<sub>3</sub>): δ = 2.38 (s, 3H), 3.39 (s, 3H), 3.61 (s, 3H), 4.03 (s, 3H), 6.84 (d, *J* = 15.6 Hz, 1H), 7.19 (d, *J* = 7.6 Hz, 2H), 7.46 (d, *J* = 7.6 Hz, 2H), 7.75 (d, *J* = 16.0 Hz, 1H) ppm. <sup>13</sup>C NMR (100 MHz, CDCl<sub>3</sub>): δ = 21.5, 28.0, 29.8, 31.5, 107.8, 110.2, 127.4, 129.7, 132.8, 138.4, 140.0, 148.6, 150.3, 151.8, 155.2 ppm. HRMS (ESI): calcd for C<sub>17</sub>H<sub>19</sub>N<sub>4</sub>O<sub>2</sub> [M+H]<sup>+</sup> 311.1508, found 311.1512.

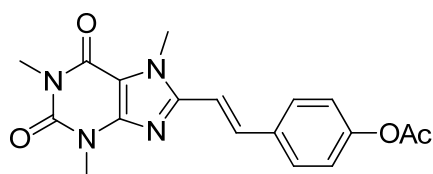

### **(*E*)-1,3,7-Trimethyl-8-(4-acetoxystyryl)-xanthine (3i)**

Pd(OAc)<sub>2</sub> (2.8 mg, 0.0125 mmol), Cu(OAc)<sub>2</sub>·H<sub>2</sub>O (150 mg, 0.75 mmol), CuCl (7.4 mg, 0.075 mmol), caffeine (97.1 mg, 0.5 mmol), 4-acetoxystyrene (486.5 mg, 3 mmol), pyridine (39.6 mg, 0.5 mmol) and *N,N*-dimethylacetamide (0.6 mL) at 120 °C for 20 h. Purification via silica gel column chromatography (petroleum ether/CH<sub>2</sub>Cl<sub>2</sub>/ethyl acetate = 2/1/1-1/1/1, v/v) afforded the desired product as a pale yellow solid (58% yield). M.p.: 206-209 °C; <sup>1</sup>H NMR (400 MHz, CDCl<sub>3</sub>): δ = 2.31 (s, 3H), 3.40 (s, 3H), 3.61 (s, 3H), 4.05 (s, 3H), 6.85 (d, *J* = 15.6 Hz, 1H), 7.13 (d, *J* = 8.4 Hz, 2H), 7.58 (d, *J* = 8.4 Hz, 2H), 7.77 (d, *J* = 15.6 Hz, 1H) ppm. <sup>13</sup>C NMR (100 MHz, CDCl<sub>3</sub>): δ = 21.3, 28.1, 29.9, 31.6, 108.1, 111.5, 122.3, 128.5, 133.3, 137.3, 148.6, 149.9, 151.6, 151.8, 155.3, 169.4 ppm. HRMS (ESI): calcd for C<sub>18</sub>H<sub>19</sub>N<sub>4</sub>O<sub>4</sub> [M+H]<sup>+</sup> 355.1406, found 355.1391.

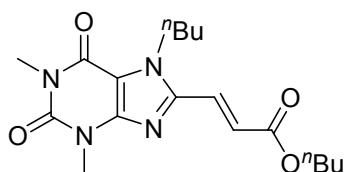

**(E)-Butyl 3-(7-butyl-1,3-dimethyl-xanthine-8-yl) acrylate (4a)**

Pd(OAc)<sub>2</sub> (2.8 mg, 0.0125 mmol), Cu(OAc)<sub>2</sub>·H<sub>2</sub>O (150 mg, 0.75 mmol), CuCl ( 7.4 mg, 0.075 mmol), 7-butyl-1,3-dimethyl-xanthine (118.1 mg, 0.5 mmol), *n*-butyl acrylate (384.5 mg, 3 mmol), pyridine (39.6 mg, 0.5 mmol) and *N,N*-dimethylacetamide (0.6 mL) at 120 °C for 20 h. Purification via silica gel column chromatography (CH<sub>2</sub>Cl<sub>2</sub>/petroleum ether/acetone = 5/10/1, v/v) afforded the desired product as a pale yellow solid (83% yield). M.p.: 81-84 °C; <sup>1</sup>H NMR (400 MHz, CDCl<sub>3</sub>): δ = 0.93-0.98 (m, 6H), 1.34-1.48 (m, 4H), 1.67-1.80 (m, 4H), 3.41 (s, 3H), 3.60 (s, 3H), 4.24 (t, *J* = 6.8 Hz, 2H), 4.43 (t, *J* = 7.2 Hz, 2H), 7.04 (d, *J* = 15.2 Hz, 1H), 7.48 (d, *J* = 15.6 Hz, 1H) ppm; <sup>13</sup>C NMR (100 MHz, CDCl<sub>3</sub>): δ = 13.7, 13.8, 19.3, 19.8, 28.2, 29.8, 30.7, 33.7, 45.3, 65.2, 108.8, 126.4, 126.7, 146.3, 148.6, 151.6, 155.0, 166.2 ppm; HRMS (ESI): calcd for C<sub>18</sub>H<sub>27</sub>N<sub>4</sub>O<sub>4</sub> [M+H]<sup>+</sup> 363.2032, found 363.2040.

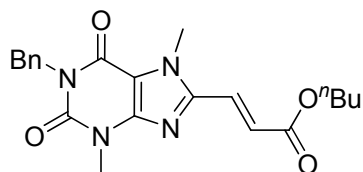

**(E)-Butyl 3-(1-benzyl-3,7-dimethyl-xanthine-8-yl) acrylate (4b)**

Pd(OAc)<sub>2</sub> (2.8 mg, 0.0125 mmol), Cu(OAc)<sub>2</sub>·H<sub>2</sub>O (150 mg, 0.75 mmol), CuCl ( 7.4 mg, 0.075 mmol), 1-benzyl-3,7-dimethyl-xanthine (135.1 mg, 0.5 mmol), *n*-butyl acrylate (384.5 mg, 3.0 mmol), pyridine (39.6 mg, 0.5 mmol) and *N,N*-dimethylacetamide (0.6 mL) at 120 °C for 20 h. Purification via silica gel column chromatography (CH<sub>2</sub>Cl<sub>2</sub>/petroleum ether/ethyl acetate = 15/20/4, v/v) afforded the desired product as a pale yellow solid (58% yield). M.p.: 172-174 °C; <sup>1</sup>H NMR (400 MHz, CDCl<sub>3</sub>): δ = 0.96 (t, *J* = 7.2 Hz, 3H), 1.40-1.48 (m, 2H), 1.64-1.72 (m, 2H), 3.57 (s, 3H), 4.08 (s, 3H), 4.24 (t, *J* = 6.8 Hz, 2H), 5.19 (s, 2H), 7.02 (d, *J* = 15.6 Hz, 1H), 7.23-7.32 (m, 3H), 7.47-7.51 (m, 3H) ppm. <sup>13</sup>C NMR (100 MHz, CDCl<sub>3</sub>): δ = 13.8, 19.2, 29.9, 30.7, 32.0, 44.6, 65.2, 109.4, 126.4, 126.6, 127.7, 128.5, 128.9,

137.3, 147.0, 148.6, 151.5, 155.2, 166.1 ppm; HRMS (ESI): calcd for C<sub>21</sub>H<sub>25</sub>N<sub>4</sub>O<sub>4</sub> [M+H]<sup>+</sup> 397.1876, found 397.1860.

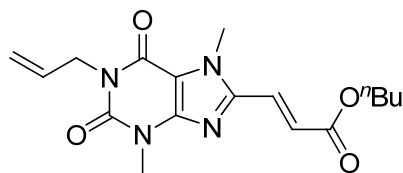

**(E)-Butyl 3-(1-allyl-3,7-dimethyl-xanthine-8-yl) acrylate (4c)**

Pd(OAc)<sub>2</sub> (2.8 mg, 0.0125 mmol), Cu(OAc)<sub>2</sub>·H<sub>2</sub>O (150 mg, 0.75 mmol), CuCl (7.4 mg, 0.075 mmol), 1-allyl-3,7-dimethylxanthine (110.1 mg, 0.5 mmol), *n*-butyl acrylate (384.5 mg, 3 mmol), pyridine (39.6 mg, 0.5 mmol) and *N,N*-dimethylacetamide (0.6 mL) at 120 °C for 20 h. Purification via silica gel column chromatography (petroleum ether/CH<sub>2</sub>Cl<sub>2</sub>/acetone = 15/1/1, v/v) afforded the desired product as a green solid (51% yield). M.p.: 131-133 °C; <sup>1</sup>H NMR (400 MHz, CDCl<sub>3</sub>): δ = 0.96 (t, *J* = 7.2 Hz, 3H), 1.36-1.48 (m, 2H), 1.65-1.72 (m, 2H), 3.58 (s, 3H), 4.08 (s, 3H), 4.24 (t, *J* = 6.8 Hz, 2H), 4.62 (d, *J* = 5.6 Hz, 2H), 5.18-5.28 (m, 2H), 5.86-5.96 (m, 1H), 7.03 (d, *J* = 15.2 Hz, 1H), 7.50 (d, *J* = 15.6 Hz, 1H) ppm. <sup>13</sup>C NMR (150 MHz, CDCl<sub>3</sub>): δ = 13.8, 19.2, 29.8, 30.8, 32.0, 43.5, 65.2, 109.4, 117.8, 126.5, 126.6, 132.3, 147.0, 148.7, 151.2, 155.0, 166.1 ppm; HRMS (ESI): calcd for C<sub>17</sub>H<sub>23</sub>N<sub>4</sub>O<sub>4</sub> [M+H]<sup>+</sup> 347.1719, found 347.1718.

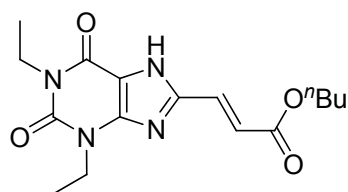

**(E)-Butyl 3-(1,3-diethyl-xanthine-8-yl) acrylate (4d)**

Pd(OAc)<sub>2</sub> (2.8 mg, 0.0125 mmol), Cu(OAc)<sub>2</sub>·H<sub>2</sub>O (150 mg, 0.75 mmol), CuCl (7.4 mg, 0.075 mmol), 1,3-diethylxanthine (104.1 mg, 0.5 mmol), *n*-butyl acrylate (384.5

mg, 3 mmol), pyridine (39.6 mg, 0.5 mmol) and N, N-dimethylacetamide (0.6 mL) at 120 °C for 20 h. Purification via silica gel column chromatography (CH<sub>2</sub>Cl<sub>2</sub>/petroleum ether/acetone = 5/10/2, v/v) afforded the desired product as white solid (71% yield). M.p.: 209.5-211 °C; <sup>1</sup>H NMR (600 MHz, CDCl<sub>3</sub>): δ = 0.96 (t, *J* = 7.8 Hz, 3H), 1.35 (t, *J* = 7.2 Hz, 3H), 1.42-1.46 (m, 5H), 1.67-1.72 (m, 2H), 4.14 (q, *J* = 7.2 Hz, 2H), 4.24 (t, *J* = 6.6 Hz, 2H), 4.47 (q, *J* = 7.2 Hz, 2H), 7.06 (d, *J* = 15.6 Hz, 1H), 7.48 (d, *J* = 15.0 Hz, 1H), 8.82 (s, 1H) ppm; <sup>13</sup>C NMR (100 MHz, CDCl<sub>3</sub>): δ = 13.4, 13.8, 17.0, 19.3, 30.8, 38.0, 40.7, 65.2, 109.0, 126.5, 126.9, 146.6, 150.1, 150.8, 154.7, 166.2 ppm. HRMS (ESI): calcd for C<sub>16</sub>H<sub>23</sub>N<sub>4</sub>O<sub>4</sub> [M+H]<sup>+</sup> 335.1719, found 345.1723.

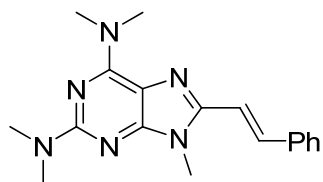

**(*E*)-N<sup>2</sup>,N<sup>2</sup>,N<sup>6</sup>,N<sup>6</sup>,9-Pentamethyl-8-styryl-9H-purine-2,6-diamine (4e)**

Pd(OAc)<sub>2</sub> (2.8 mg, 0.0125 mmol), Cu(OAc)<sub>2</sub>·H<sub>2</sub>O (150 mg, 0.75 mmol), CuCl ( 7.4 mg, 0.075 mmol), 9-methyl-2,6-bis(dimethylamino)-purine (110.1 mg, 0.5 mmol), styrene (312.4 mg, 3 mmol), pyridine (39.6 mg, 0.5 mmol) and N,N-dimethylacetamide (0.6 mL) at 120 °C for 20 h. Purification via silica gel column chromatography (petroleum ether/CH<sub>2</sub>Cl<sub>2</sub>/ethyl acetate = 15/3/1-12/3/1, v/v) afforded the desired product as a yellow solid (92% yield). M.p.: 154-156 °C; <sup>1</sup>H NMR (400 MHz, CDCl<sub>3</sub>): δ = 3.20 (s, 6H), 3.52 (s, 6H), 3.74 (s, 3H), 7.01 (d, *J* = 16.0 Hz, 1H), 7.27-7.31 (m, 1H), 7.37 (t, *J* = 7.6 Hz, 2H), 7.56 (d, *J* = 7.6 Hz, 2H), 7.64 (d, *J* = 16.0 Hz, 1H) ppm. <sup>13</sup>C NMR (100 MHz, CDCl<sub>3</sub>): δ = 28.7, 37.5, 38.3, 114.2, 127.0, 128.5, 128.9, 133.3, 136.7, 144.1, 154.3, 158.7 ppm; HRMS (ESI): calcd for C<sub>18</sub>H<sub>23</sub>N<sub>6</sub> [M+H]<sup>+</sup> 323.1984, found 323.1983.

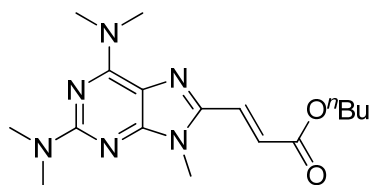

**(E)-Butyl 3-(2,6-bis(dimethylamino)-9-methyl-9H-purin-8-yl) acrylate (4f)**

Pd(OAc)<sub>2</sub> (2.8 mg, 0.0125 mmol), Cu(OAc)<sub>2</sub>·H<sub>2</sub>O (300 mg, 1.50 mmol), CuCl ( 7.4 mg, 0.075 mmol), 9-methyl-2,6-bis(dimethylamino)-purine (110.1 mg, 0.5 mmol), *n*-butyl acrylate (384.5 mg, 3 mmol), pyridine (39.6 mg, 0.5 mmol) and *N,N*-dimethylacetamide (0.6 mL) at 120 °C for 20 h. Purification via silica gel column chromatography (petroleum ether/CH<sub>2</sub>Cl<sub>2</sub>/ethyl acetate = 15/3/1-12/3/1, v/v) afforded the desired product as a golden yellow solid (75% yield). M.p.: 92-94 °C; <sup>1</sup>H NMR (400 MHz, CDCl<sub>3</sub>): δ = 0.94 (t, *J* = 7.2 Hz, 3H), 1.37-1.46 (m, 2H), 1.63-1.70 (m, 2H), 3.15 (s, 6H), 3.44 (s, 6H), 3.66 (s, 3H), 4.19 (t, *J* = 6.4 Hz, 2H), 6.80 (d, *J* = 15.6 Hz, 1H), 7.53 (d, *J* = 15.6 Hz, 1H) ppm. <sup>13</sup>C NMR (100 MHz, CDCl<sub>3</sub>): δ = 13.8, 19.2, 28.3, 30.8, 37.2, 38.2, 64.5, 115.6, 120.0, 129.8, 140.8, 154.7, 154.7, 159.6, 167.0 ppm; HRMS (ESI): calcd for C<sub>17</sub>H<sub>27</sub>N<sub>6</sub>O<sub>2</sub> [M+H]<sup>+</sup> 347.2195, found 347.2204.

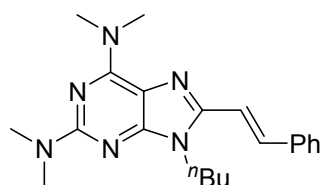

**(E)-9-Butyl-*N*<sup>2</sup>,*N*<sup>2</sup>,*N*<sup>6</sup>,*N*<sup>6</sup>-tetramethyl-8-styryl-9H-purine-2,6-diamine (4g)**

Pd(OAc)<sub>2</sub> (2.8 mg, 0.0125 mmol), Cu(OAc)<sub>2</sub>·H<sub>2</sub>O (150 mg, 0.75 mmol), CuCl ( 7.4 mg, 0.075 mmol), 9-butyl-2,6-bis(dimethylamino)-purine (131.2 mg, 0.5 mmol), styrene (312.4 mg, 3 mmol), pyridine (39.6 mg, 0.5 mmol) and *N,N*-dimethylacetamide (0.6 mL) at 120 °C for 20 h. Purification via silica gel column chromatography (petroleum ether/CH<sub>2</sub>Cl<sub>2</sub>/ethyl acetate = 15/3/1-12/3/1, v/v) afforded the desired product as a yellow solid (90% yield). M.p.: 101-103 °C; <sup>1</sup>H NMR (400 MHz, CDCl<sub>3</sub>): δ = 0.96 (t, *J* = 7.2 Hz, 3H), 1.33-1.39 (m, 2H), 1.75-1.82 (m, 2H),

3.19 (s, 6H), 3.52 (s, 6H), 4.18 (t,  $J = 6.8$  Hz, 2H), 6.98 (d,  $J = 15.6$  Hz, 1H), 7.28-7.31 (m, 1H), 7.38 (t,  $J = 7.2$  Hz, 2H), 7.56 (d,  $J = 7.6$  Hz, 2H), 7.68 (d,  $J = 15.6$  Hz, 1H) ppm.  $^{13}\text{C}$  NMR (100 MHz,  $\text{CDCl}_3$ ):  $\delta = 13.8, 19.9, 32.3, 37.4, 38.3, 41.4, 114.2, 114.4, 127.0, 128.3, 128.9, 132.9, 136.9, 143.5, 154.4, 159.2$  ppm; HRMS (ESI): calcd for  $\text{C}_{21}\text{H}_{29}\text{N}_6$   $[\text{M}+\text{H}]^+$  365.2454, found 345.2446.

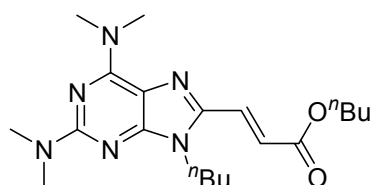

**(E)-Butyl 3-(9-butyl-2,6-bis(dimethylamino)-9H-purin-8-yl) acrylate (4h)**

$\text{Pd}(\text{OAc})_2$  (2.8 mg, 0.0125 mmol),  $\text{Cu}(\text{OAc})_2 \cdot \text{H}_2\text{O}$  (300 mg, 1.50 mmol),  $\text{CuCl}$  (7.4 mg, 0.075 mmol), 9-butyl-2,6-bis(dimethylamino)-purine (131.2 mg, 0.5 mmol), *n*-butyl acrylate (384.5 mg, 3 mmol), pyridine (39.6 mg, 0.5 mmol) and *N,N*-dimethylacetamide (0.6 mL) at 120 °C for 20 h. Purification via silica gel column chromatography (petroleum ether/ $\text{CH}_2\text{Cl}_2$ /ethyl acetate = 15/3/1-12/3/1, v/v) afforded the desired product as a golden yellow solid (75% yield). M.p.: 84-86 °C;  $^1\text{H}$  NMR (400 MHz,  $\text{CDCl}_3$ ):  $\delta = 0.95$  (q,  $J = 7.6$  Hz, 6H), 1.29-1.34 (m, 2H), 1.41-1.46 (m, 2H), 1.64-1.77 (m, 4H), 3.18 (s, 6H), 3.48 (s, 6H), 4.15 (t,  $J = 6.8$  Hz, 2H), 4.22 (t,  $J = 6.8$  Hz, 2H), 6.89 (d,  $J = 15.6$  Hz, 1H), 7.55 (d,  $J = 15.6$  Hz, 1H) ppm.  $^{13}\text{C}$  NMR (100 MHz,  $\text{CDCl}_3$ ):  $\delta = 13.7, 13.9, 19.3, 19.9, 30.9, 32.5, 37.3, 41.5, 64.6, 115.6, 120.3, 129.7, 140.5, 154.7, 154.8, 159.6, 167.2$  ppm; HRMS (ESI): calcd for  $\text{C}_{20}\text{H}_{33}\text{N}_6\text{O}_2$   $[\text{M}+\text{H}]^+$  389.2665, found 389.2656.

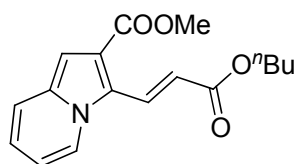

**(E)-Methyl 3-(3-butoxy-3-oxoprop-1-enyl) indolizine-2-carboxylate (4i)**

Pd(dppf)Cl<sub>2</sub> (9.2 mg, 0.0125 mmol), Cu(OAc)<sub>2</sub>·H<sub>2</sub>O (150 mg, 0.75 mmol), CuCl (7.4 mg, 0.075 mmol), methyl indolizine-2-carboxylate (87.6 mg, 0.5 mmol), *n*-butyl acrylate (384.5 mg, 3 mmol), pyridine (39.6 mg, 0.5 mmol) and *N,N*-dimethylacetamide (0.6 mL) at 120 °C for 20 h. Purification via silica gel column chromatography (petroleum ether/diethyl ether = 15/1-10/1, v/v) afforded the desired product as a yellow solid (60% yield). M.p.: 58-60 °C; <sup>1</sup>H NMR (400 MHz, CDCl<sub>3</sub>): δ = 0.97 (t, *J* = 7.2 Hz, 3H), 1.43-1.48 (m, 2H), 1.68-1.75 (m, 2H), 3.92 (s, 3H), 4.24 (t, *J* = 6.8 Hz, 2H), 6.61 (d, *J* = 16.4 Hz, 1H), 6.78 (t, *J* = 6.8 Hz, 1H), 6.88-6.92 (m, 1H), 7.03 (s, 1H), 7.47 (d, *J* = 9.2 Hz, 1H), 8.36 (d, *J* = 7.2 Hz, 1H), 8.49 (d, *J* = 16.4 Hz, 1H) ppm. <sup>13</sup>C NMR (100 MHz, CDCl<sub>3</sub>): δ = 13.9, 19.3, 31.0, 52.0, 64.6, 105.5, 114.3, 115.5, 120.7, 120.9, 121.7, 121.8, 124.9, 131.0, 135.2, 165.2, 168.1 ppm; HRMS (ESI): calcd for C<sub>17</sub>H<sub>20</sub>NO<sub>4</sub> [M+H]<sup>+</sup> 302.1392, found 302.1399.

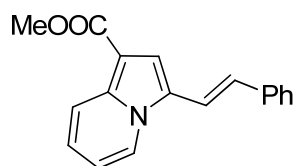

**(E)-Methyl 3-styrylindolizine-1-carboxylate (4j)**

Pd(dppf)Cl<sub>2</sub> (9.2 mg, 0.0125 mmol), Cu(OAc)<sub>2</sub>·H<sub>2</sub>O (150 mg, 0.75 mmol), CuCl (7.4 mg, 0.075 mmol), methyl indolizine-1-carboxylate (87.6 mg, 0.5 mmol), styrene (312.4 mg, 3 mmol), pyridine (39.6 mg, 0.5 mmol) and *N,N*-Dimethylacetamide (0.6 mL) at 120 °C for 20 h. Purification via silica gel column chromatography (petroleum ether/ethyl acetate/toluene = 25/2/1-20/2/1, v/v) afforded the desired product as a yellow solid (47% yield). M.p.: 109-112 °C; <sup>1</sup>H NMR (400 MHz, DMSO-*d*<sub>6</sub>): δ = 3.82 (s, 3H), 6.99 (t, *J* = 6.4 Hz, 1H), 7.21-7.32 (m, 3H), 7.38 (t, *J* = 7.2 Hz, 2H), 7.64 (s, 1H), 7.69 (d, *J* = 8.4 Hz, 3H), 8.10 (d, *J* = 8.8 Hz, 1H), 8.88 (d, *J* = 6.8 Hz, 1H) ppm; <sup>13</sup>C NMR (100 MHz, DMSO-*d*<sub>6</sub>): δ = 50.8, 103.6, 112.7, 113.2, 114.8, 118.9, 123.2, 124.8, 125.0, 126.4, 127.3, 127.5, 128.6, 135.6, 137.4, 164.1 ppm; HRMS (ESI): calcd for C<sub>18</sub>H<sub>15</sub>NNaO<sub>2</sub> [M+Na]<sup>+</sup> 300.1000, found 300.1000.

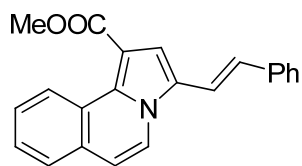

**(E)-Methyl 3-styryl pyrrolo[2,1-a]isoquinoline-1-carboxylate (4k)**

Pd(dppf)Cl<sub>2</sub> (9.2 mg, 0.0125 mmol), Cu(OAc)<sub>2</sub>·H<sub>2</sub>O (150 mg, 0.75 mmol), CuCl (7.4 mg, 0.075 mmol), methyl pyrrolo[2,1-a]isoquinoline-1-carboxylate (112.6 mg, 0.5 mmol), styrene (312.4 mg, 3 mmol), pyridine (39.6 mg, 0.5 mmol) and N,N-dimethylacetamide (0.6 mL) at 120 °C for 20 h. Purification via silica gel column chromatography (petroleum ether/ethyl ether/CH<sub>2</sub>Cl<sub>2</sub> = 25/2/1-20/2/1, v/v) afforded the desired product as a yellow solid (64% yield). M.p.: 141-144 °C; <sup>1</sup>H NMR (400 MHz, DMSO-*d*<sub>6</sub>): δ = 3.88 (s, 3H), 7.26-7.42 (m, 5H), 7.56-7.63 (m, 2H), 7.66 (s, 1H), 7.72-7.75 (m, 3H), 7.84 (d, *J* = 7.2 Hz, 1H), 8.72 (d, *J* = 7.6 Hz, 1H), 9.68 (d, *J* = 8.0 Hz, 1H) ppm; <sup>13</sup>C NMR (100 MHz, DMSO-*d*<sub>6</sub>): δ = 51.4, 108.7, 113.2, 113.5, 114.8, 122.6, 125.0, 126.2, 126.5, 126.6, 127.0, 127.4, 127.5, 127.7, 128.6, 128.8, 131.3, 137.2, 164.9 ppm; HRMS (ESI): calcd for C<sub>22</sub>H<sub>18</sub>NO<sub>2</sub> [M+H]<sup>+</sup> 328.1338, found 328.1333.

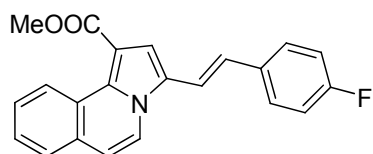

**(E)-Methyl 3-(4-fluorostyryl) pyrrolo[2,1-a]isoquinoline-1-carboxylate (4l)**

Pd(dppf)Cl<sub>2</sub> (9.2 mg, 0.0125 mmol), Cu(OAc)<sub>2</sub>·H<sub>2</sub>O (150 mg, 0.75 mmol), CuCl (7.4 mg, 0.075 mmol), methyl pyrrolo[2,1-a]isoquinoline-1-carboxylate (112.6 mg, 0.5 mmol), 4-fluorostyrene (366.4 mg, 3 mmol), pyridine (39.6 mg, 0.5 mmol) and N,N-dimethylacetamide (0.6 mL) at 120 °C for 20 h. Purification via silica gel column chromatography (petroleum ether/ethyl ether/CH<sub>2</sub>Cl<sub>2</sub> = 35/2/1-25/2/1, v/v) afforded the desired product as a yellow solid (62% yield). M.p.: 165-168 °C; <sup>1</sup>H NMR (400



MHz, CDCl<sub>3</sub>):  $\delta$  = 3.96 (s, 3H), 7.04-7.12 (m, 5H), 7.48-7.53 (m, 4H), 7.59-7.66 (m, 2H), 7.98 (d,  $J$  = 7.6 Hz, 1H), 9.80 (d,  $J$  = 8.0 Hz, 1H) ppm; <sup>13</sup>C NMR (100 MHz, CDCl<sub>3</sub>):  $\delta$  = 51.7, 109.3, 114.1, 114.3, 114.5, 114.5, 115.8, 116.0, 121.0, 125.9, 126.0, 126.8, 127.2, 127.8, 127.9, 128.0, 128.0, 128.5, 128.8, 132.9, 133.4, 133.5, 165.8 ppm; HRMS (ESI): calcd for C<sub>22</sub>H<sub>16</sub>FNNaO<sub>2</sub> [M+Na]<sup>+</sup> 348.1063, found 348.1069.

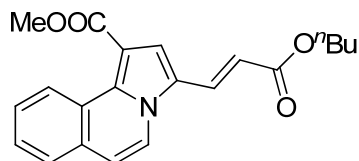

**(E)-Methyl (3-butoxy-3-oxoprop-1-enyl) pyrrolo[2,1-a]isoquinoline-1-carboxylate (4m)**

Pd(dppf)Cl<sub>2</sub> (9.2 mg, 0.0125 mmol), Cu(OAc)<sub>2</sub>·H<sub>2</sub>O (300 mg, 1.5 mmol), CuCl (7.4 mg, 0.075 mmol), methyl pyrrolo[2,1-a]isoquinoline-1-carboxylate (112.6 mg, 0.5 mmol), *n*-butyl acrylate (384.5 mg, 3 mmol), pyridine (39.6 mg, 0.5 mmol) and *N,N*-dimethylacetamide (0.6 mL) at 120 °C for 20 h. Purification via silica gel column chromatography (petroleum ether/ethyl ether = 50/1-20/1, v/v) afforded the desired product as a yellow solid (68% yield). M.p.: 102-105 °C; <sup>1</sup>H NMR (400 MHz, CDCl<sub>3</sub>):  $\delta$  = 0.98 (t,  $J$  = 7.2 Hz, 3H), 1.43-1.48 (m, 2H), 1.67-1.73 (m, 2H), 3.94 (s, 3H), 4.23 (t,  $J$  = 6.4 Hz, 2H), 6.44 (d,  $J$  = 15.6 Hz, 1H), 7.11 (d,  $J$  = 7.6 Hz, 1H), 7.53-7.71 (m, 4H), 7.91 (d,  $J$  = 15.6 Hz, 1H), 8.07 (d,  $J$  = 7.2 Hz, 1H), 9.77 (d,  $J$  = 8.4 Hz, 1H) ppm; <sup>13</sup>C NMR (150 MHz, CDCl<sub>3</sub>):  $\delta$  = 13.9, 19.4, 31.0, 51.8, 64.6, 110.6, 115.0, 115.8, 118.5, 120.9, 123.2, 125.7, 126.9, 127.6, 128.2, 129.3, 129.8, 134.7, 165.4, 167.5 ppm; HRMS (ESI): calcd for C<sub>21</sub>H<sub>22</sub>NO<sub>4</sub> [M+H]<sup>+</sup> 352.1549, found 352.1547.

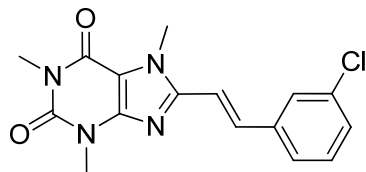

**(E)-1,3,7-Trimethyl-8-(3-chlorostyryl)-xanthine (CSC)**

Pd(OAc)<sub>2</sub> (2.8 mg, 0.0125 mmol), Cu(OAc)<sub>2</sub>·H<sub>2</sub>O (150 mg, 0.75 mmol), CuCl (7.4 mg, 0.075 mmol), caffeine (97.1 mg, 0.5 mmol), 3-chlorostyrene (415.8 mg, 3 mmol), pyridine (39.6 mg, 0.5 mmol) and N,N-dimethylacetamide (0.6 mL) at 120 °C for 20 h. Purification via silica gel column chromatography (petroleum ether/CH<sub>2</sub>Cl<sub>2</sub>/acetone = 8/1/1-6/1/1, v/v) afforded the desired product as a pale yellow solid (65% yield). M.p.: 195-197 °C; <sup>1</sup>H NMR (400 MHz, CDCl<sub>3</sub>): δ = 3.41 (s, 3H), 3.62 (s, 3H), 4.08 (s, 3H), 6.92 (d, *J* = 15.6 Hz, 1H), 7.33 (d, *J* = 4.8 Hz, 2H), 7.43 (d, *J* = 4.0 Hz, 1H), 7.57 (s, 1H), 7.74 (d, *J* = 15.6 Hz, 1H) ppm. <sup>13</sup>C NMR (100 MHz, CDCl<sub>3</sub>): δ = 28.1, 29.9, 31.7, 108.3, 112.7, 125.9, 127.0, 129.5, 130.3, 135.1, 136.8, 137.4, 148.6, 149.5, 151.8, 155.4 ppm. MS (ESI): calcd for C<sub>16</sub>H<sub>16</sub>N<sub>4</sub>O<sub>2</sub>Cl [M+H]<sup>+</sup> 331.0, found 331.0.

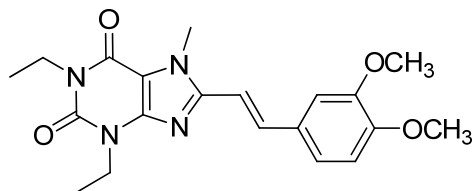

**(E)-8-(3,4-Dimethoxystyryl)-1,3-diethyl-7-methyl-1H-purine-2,6(3H,7H)-dione (KW6002)**

Pd(OAc)<sub>2</sub> (2.8 mg, 0.0125 mmol), Cu(OAc)<sub>2</sub>·H<sub>2</sub>O (150 mg, 0.75 mmol), CuCl (7.4 mg, 0.075 mmol), 1,3-diethyl-7-methyl-1H-purine-2,6(3H,7H)-dione (111.1 mg, 0.5 mmol), 3,4-dimethoxystyrene (492.6 mg, 3 mmol), pyridine (39.6 mg, 0.5 mmol) and N,N-dimethylacetamide (0.6 mL) at 120 °C for 20 h. Purification via silica gel column chromatography (petroleum ether/CH<sub>2</sub>Cl<sub>2</sub>/acetone = 6/1/0.4-8/1/1, v/v) afforded the desired product as a yellow solid (95% yield). M.p.: 209-211 °C; <sup>1</sup>H NMR (400 MHz, CDCl<sub>3</sub>): δ = 1.39 (t, *J* = 6.8 Hz, 3H), 1.47 (t, *J* = 6.8 Hz, 3H), 3.42 (s, 3H), 3.93 (s,

3H), 3.96 (s, 3H), 4.22 (q,  $J = 7.2$  Hz, 2H), 4.49 (q,  $J = 7.2$  Hz, 2H), 6.75 (d,  $J = 15.6$  Hz, 1H), 6.90 (d,  $J = 8.4$  Hz, 1H), 7.08 (s, 1H), 7.19 (d,  $J = 8.0$  Hz, 1H), 7.77 (d,  $J = 15.6$  Hz, 1H) ppm.  $^{13}\text{C}$  NMR (100 MHz,  $\text{CDCl}_3$ ):  $\delta = 13.6, 16.8, 27.9, 38.6, 40.0, 56.1, 56.1, 107.2, 109.3, 109.9, 111.4, 121.2, 128.8, 138.3, 148.5, 149.3, 149.6, 150.5, 151.3, 155.0$  ppm. MS (ESI): calcd for  $\text{C}_{20}\text{H}_{25}\text{N}_4\text{O}_4$   $[\text{M}+\text{H}]^+$  385.2, found 385.2.

## V. Absorption and fluorescence emission data of compounds 3a-3i and 4a-4m

**Table S3** UV absorption and fluorescence emission maxima of N-heteroarenes **3** and **4** in DCM.

| compd.    | $\lambda_{\text{abs}}/\lambda_{\text{em}}$ [nm] | Stokes shift [nm] | compd.    | $\lambda_{\text{abs}}/\lambda_{\text{em}}$ [nm] | Stokes shift [nm] |
|-----------|-------------------------------------------------|-------------------|-----------|-------------------------------------------------|-------------------|
| <b>3a</b> | 353/422                                         | 69                | <b>4c</b> | 351/422                                         | 71                |
| <b>3b</b> | 353/423                                         | 70                | <b>4d</b> | 349/417                                         | 68                |
| <b>3c</b> | 348/420                                         | 72                | <b>4e</b> | 395/483                                         | 88                |
| <b>3d</b> | 348/402                                         | 54                | <b>4f</b> | 417/510                                         | 93                |
| <b>3e</b> | 354/417                                         | 63                | <b>4g</b> | 395/482                                         | 87                |
| <b>3f</b> | 353/417                                         | 64                | <b>4h</b> | 417/508                                         | 91                |
| <b>3g</b> | 358/423                                         | 65                | <b>4i</b> | 394/446                                         | 52                |
| <b>3h</b> | 355/418                                         | 63                | <b>4j</b> | 368/461                                         | 93                |
| <b>3i</b> | 356/421                                         | 65                | <b>4k</b> | 367/435                                         | 68                |
| <b>4a</b> | 349/421                                         | 72                | <b>4l</b> | 365/434                                         | 69                |
| <b>4b</b> | 353/421                                         | 68                | <b>4m</b> | 381/433                                         | 52                |

## VI. Cell culture experiments, imaging of living-cells and cytotoxicity assays

The human hepatocellular carcinoma cell (SMMC-7721) lines were purchased from American Type Culture Collection. The cells were seeded in a 8-well tissue culture plate for one day and then cultured following ATCC protocols (The cells were maintained at 37 °C, 5% CO<sub>2</sub> atmosphere in Duplecco's Minimum Essential Medium (DMEM) medium supplemented with 10% FBS, 2 mM L-glutamine, 100 units/mL of penicillin, and 100 mg/mL of streptomycin for overnight). For imaging experiments, live cells were coincubated with 5 μM **4f** in a physiological saline solution containing 1% DMSO for 40 min at 37 °C. The cells were observed with a Fluorescence Inverted Microscope (IX71, OLYMPUS) and photographed by using Spot Flex.

### Cytotoxicity assays

3-(4,5-Dimethylthiazol-2-yl)-2,5-diphenyltetrazolium bromide (MTT) assay were performed to evaluate the cytotoxicity effect of **4e**, **4f** and **3g**. HepG2 cells or A549 cells were incubated in a 96-well culture plates at a volume of 100 μL (5×10<sup>4</sup> cells/mL) for a stationary culture. This media were changed into fresh media with a final volume of 200 μL containing sample in the 2-fold down dilution series and then incubated for 24 hours. Then 20 μL of MTT (5 mg/mL in phosphate-buffered saline (PBS)) was added to each well, incubated for an additional 4 hours. After centrifuged at 1000 rpm for 5 min, the medium was removed. MTT formazan precipitate was dissolved in 150 μL of DMSO, shaken mechanically for 5 min and then absorbance readings at a wavelength of 570 nm were taken on a spectrophotometer (Molecular Devices, Sunnyvale, USA). The cell viability was calculated by the following formula:

(mean optical density (OD) in treated wells/mean OD in control wells)  $\times$  100%.

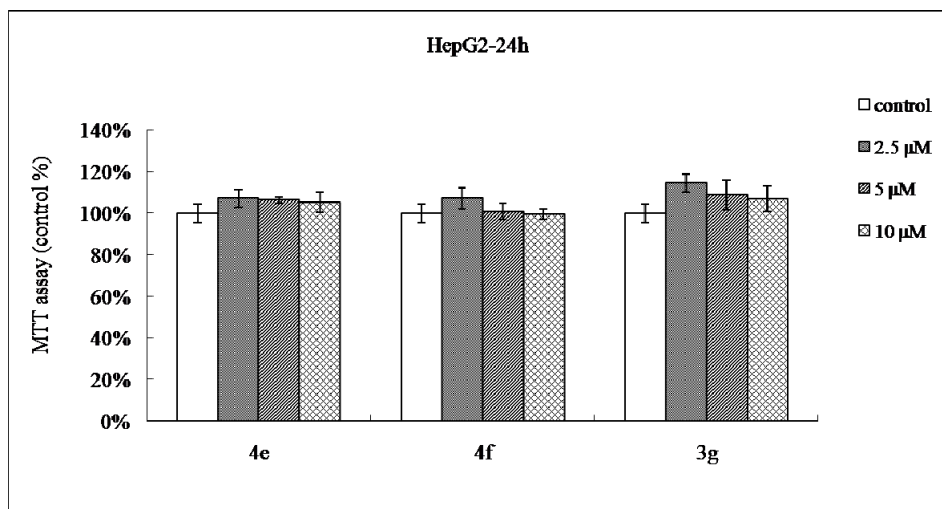

**Fig. S1** Cell viability values (%) estimated by MTT assays on HepG2 cells, which were cultured in the presence of 2.5-10  $\mu$ M of sample for 24 h at 37  $^{\circ}$ C.

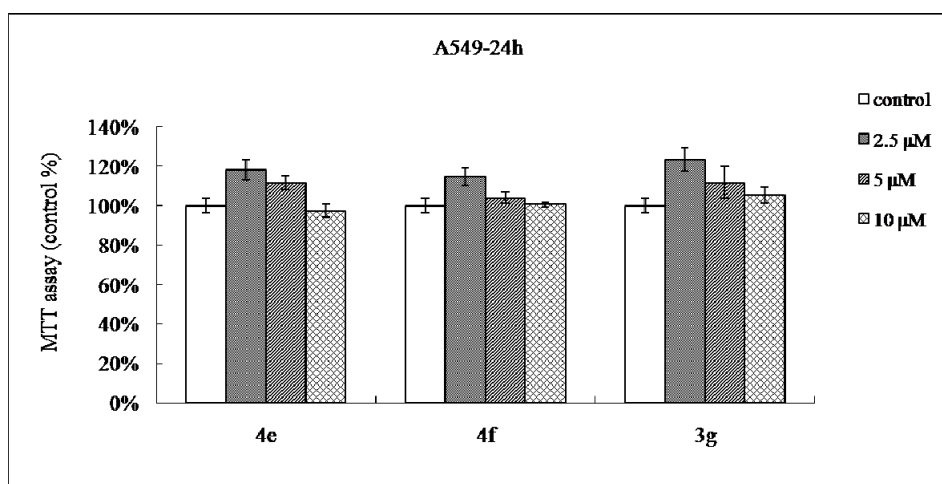

**Fig. S2** Cell viability values (%) estimated by MTT assays on A549 cells, which were cultured in the presence of 2.5-10  $\mu$ M of sample for 24 h at 37  $^{\circ}$ C.

## VII. References

- (1) J. W. Daly, W. L. Padgett and M. T. Shamim, *J. Med. Chem.*, 1986, **29**, 1305.
- (2) (a) P. Xi, F. Yang, S. Qin, D. Zhao, J. Lan, G. Gao, C. Hu and J. You, *J. Am. Chem. Soc.* 2010, **132**, 1822; (b) D. van den Berg, K. R. Zoellner, M. O. Ogunrombi, S. F. Malan, G. Terre'Blanche, N. Castagnoli, Jr., J. J. Bergh and J. P. Petzer, *Bioorg. Med.*

*Chem.* 2007, **15**, 3692.

(3) R. S. Butler, P. Cohn, P. Tenzel, K. A. Abboud and R. K. Castellano, *J. Am. Chem. Soc.*, 2009, **131**, 623.

(4) (a) L. Zhang, F. Liang, L. Sun, Y. Hu and H. Hu, *Synthesis*, 2000, 1733. (b) M. L. Bode and P. T. Kaye, *J. Chem. Soc., Perkin Trans. 1*, 1993, 1809.

### VIII. $^1\text{H}$ and $^{13}\text{C}$ NMR spectra of compounds 3a-3i, 4a-4m, CSC and KW6002

N-BUTYL H1 CDC13 2008-12-16  
Pulse Sequence: s2pu1

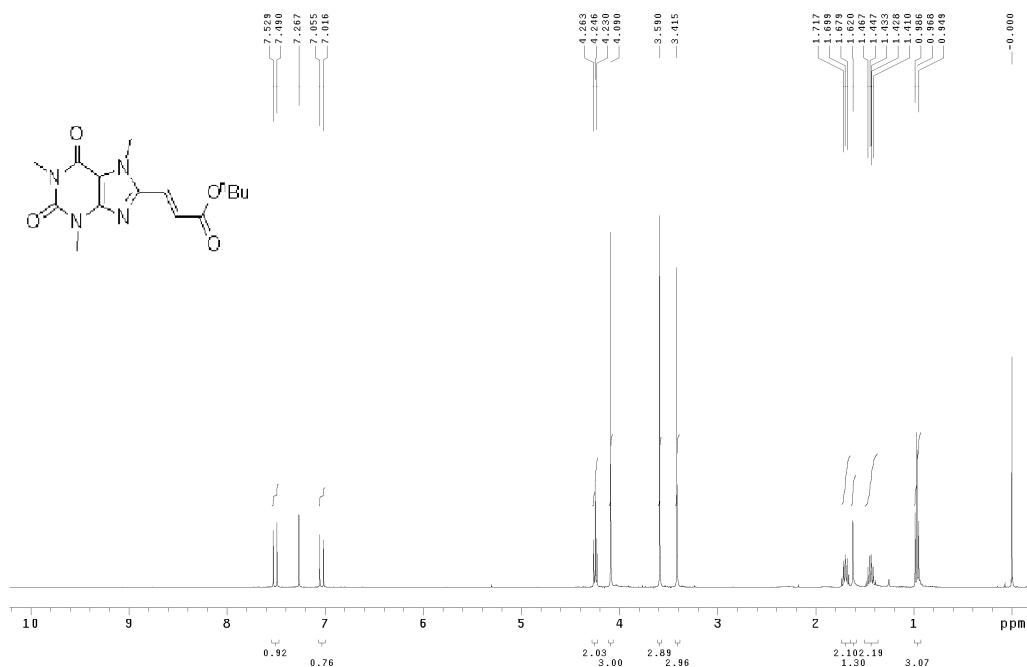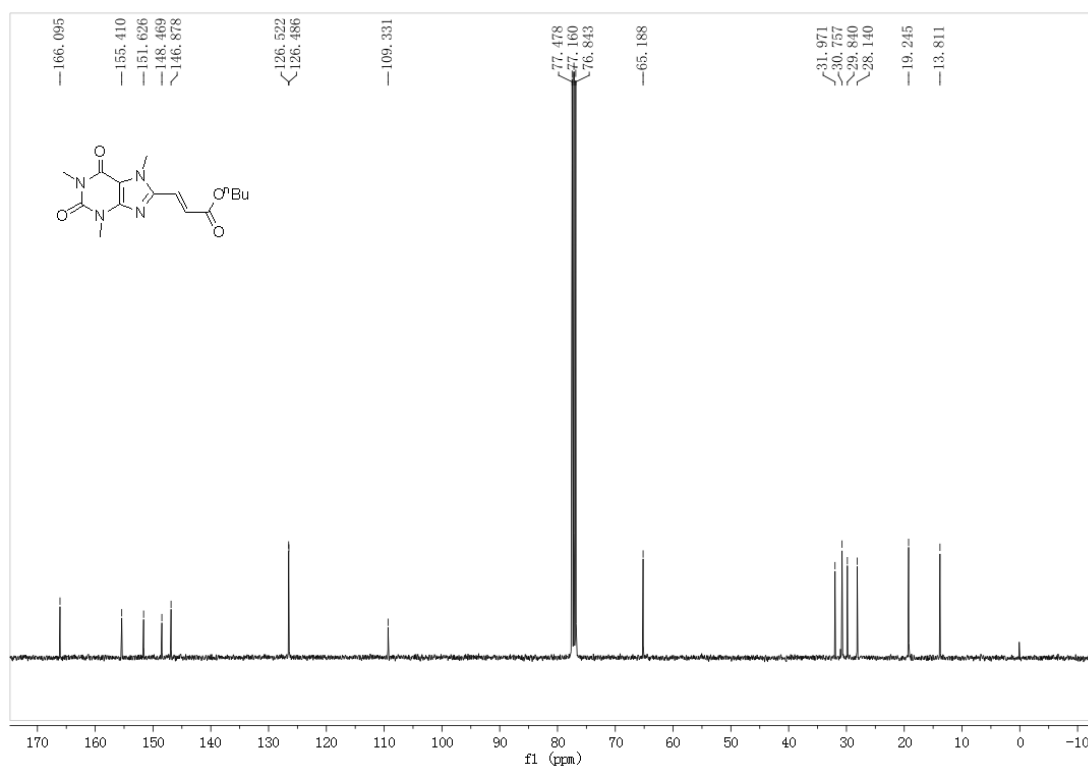

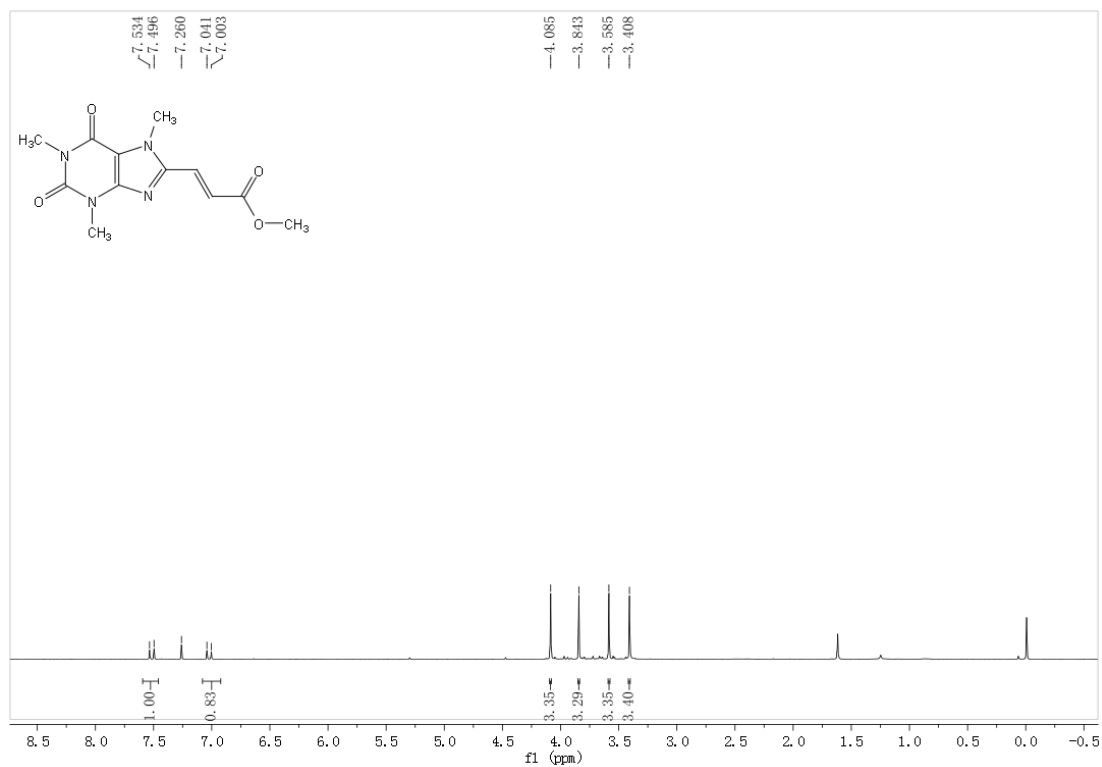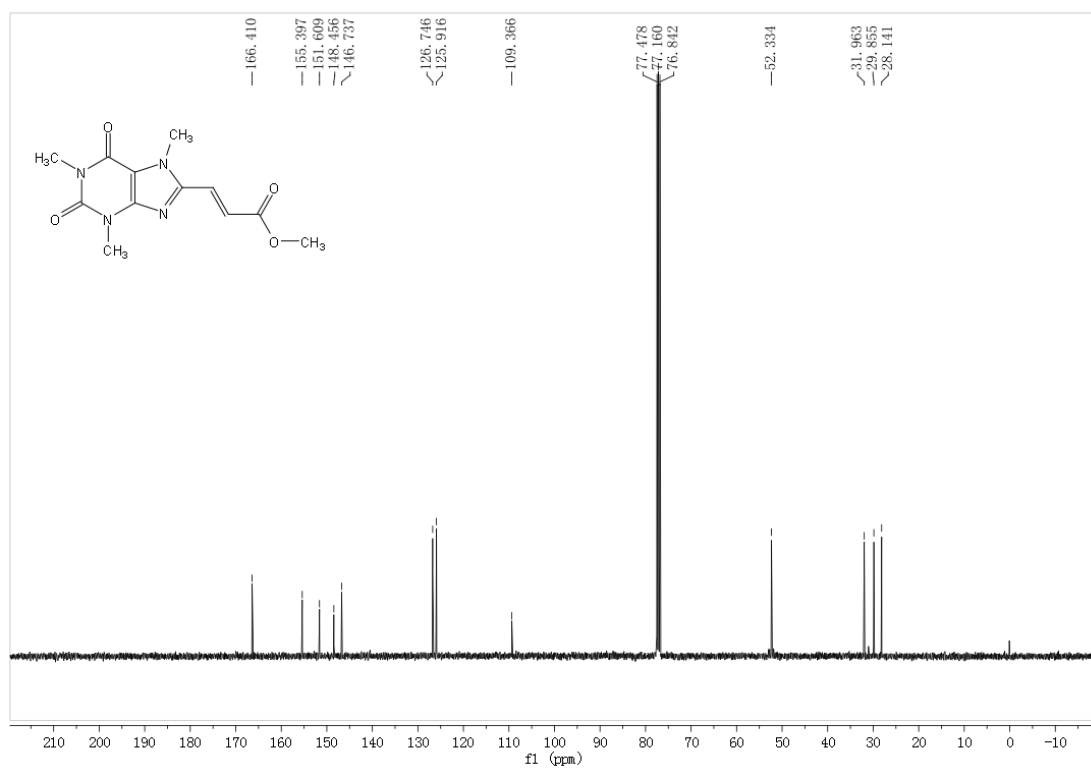



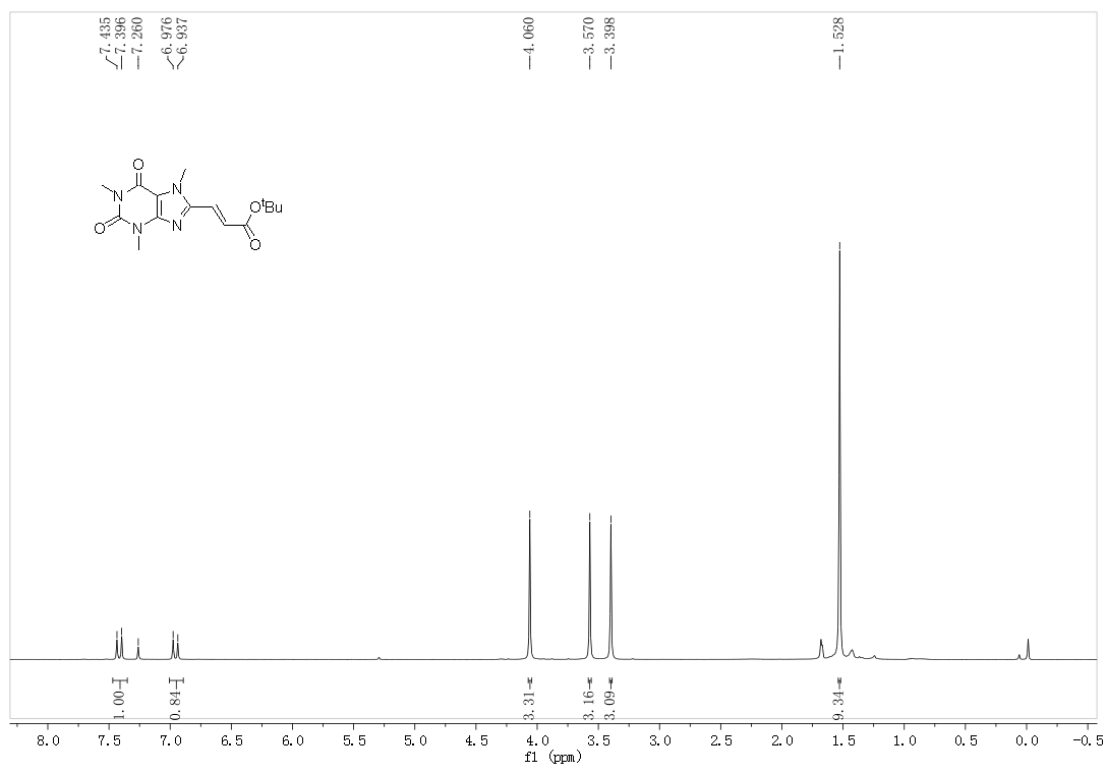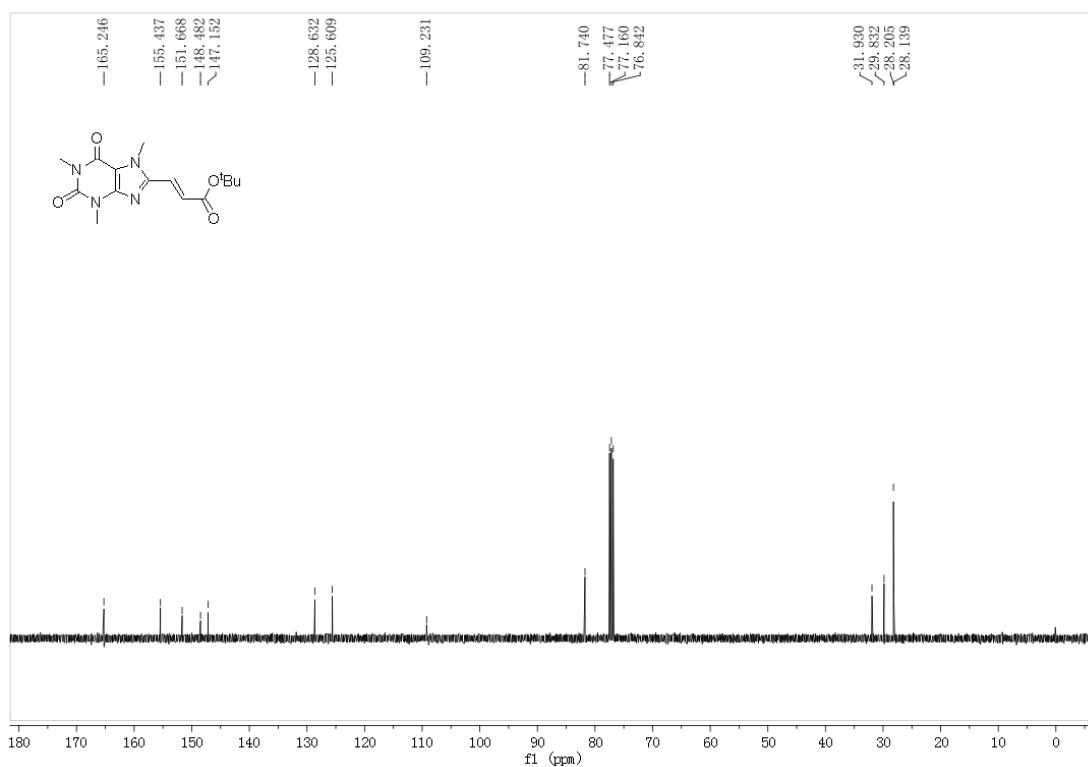

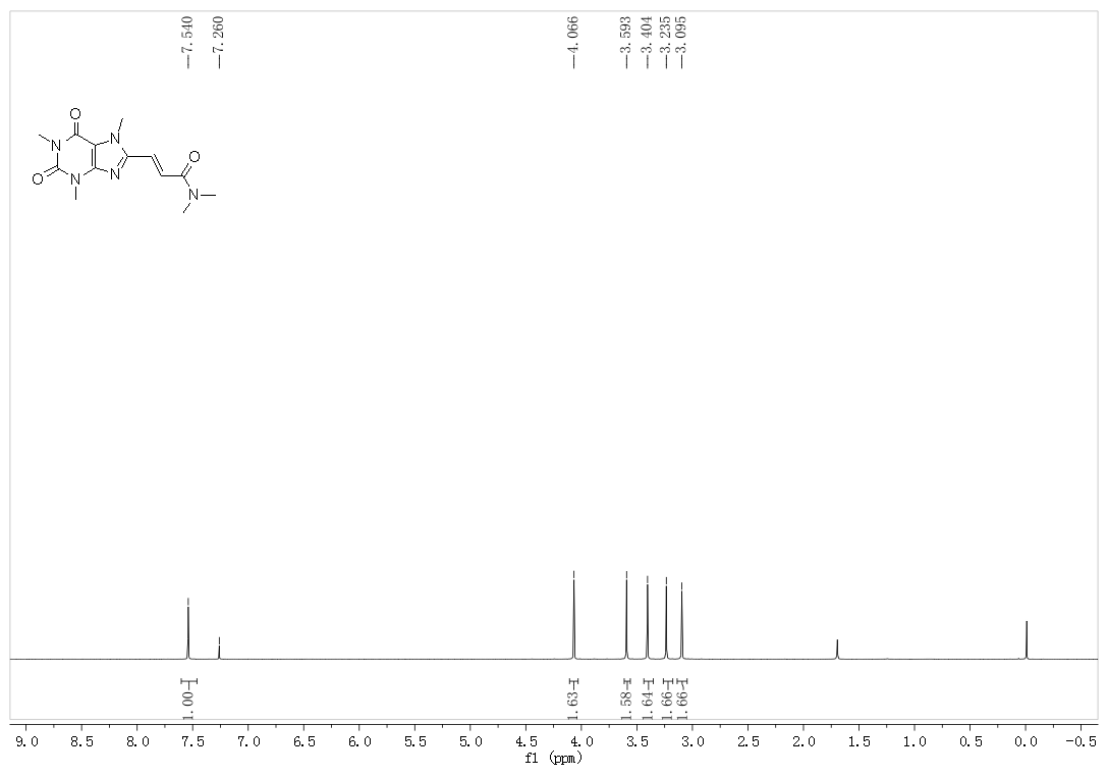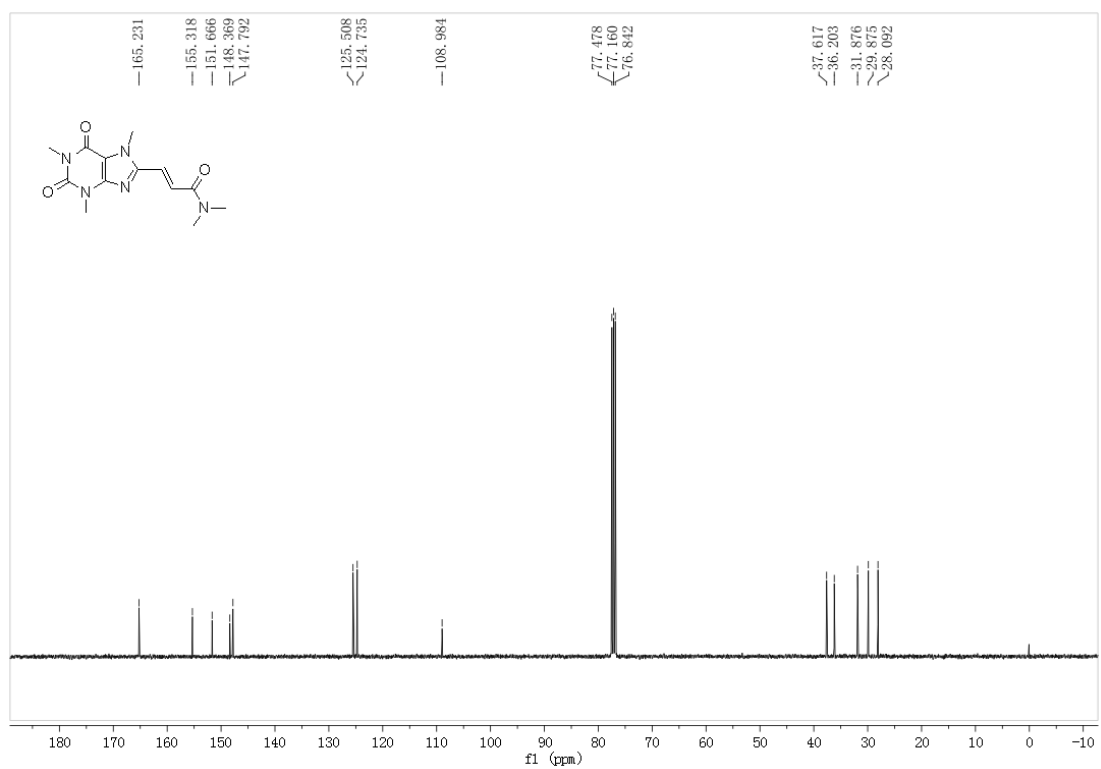

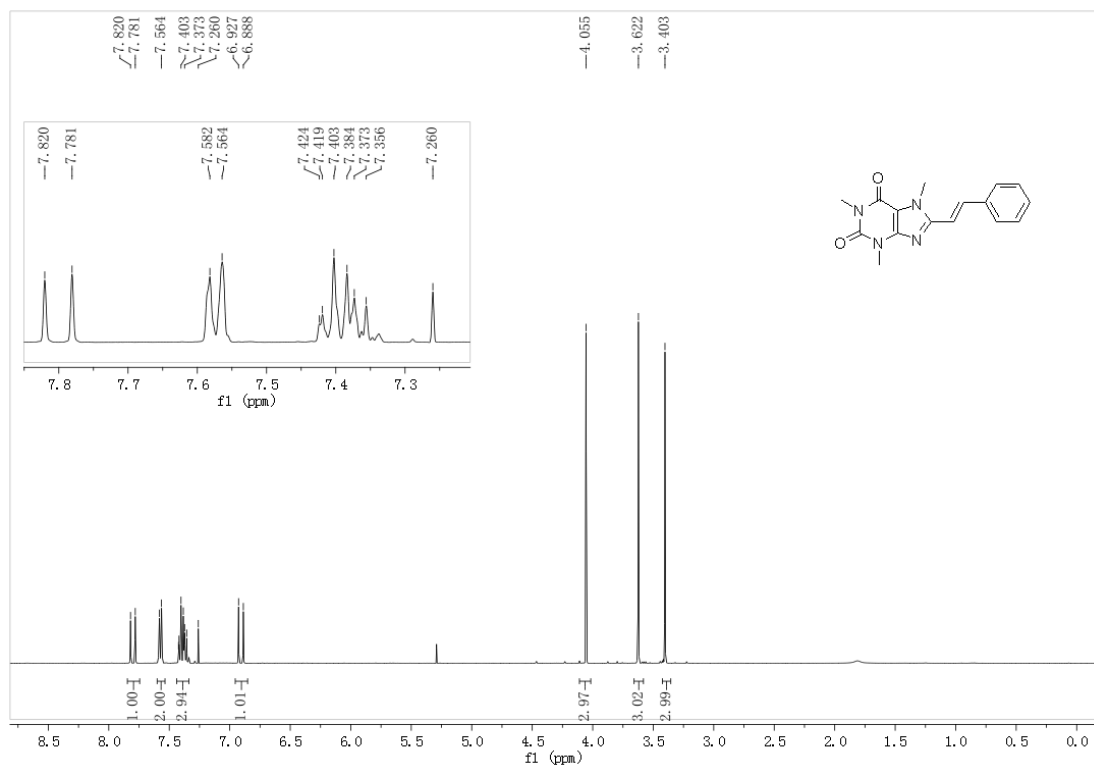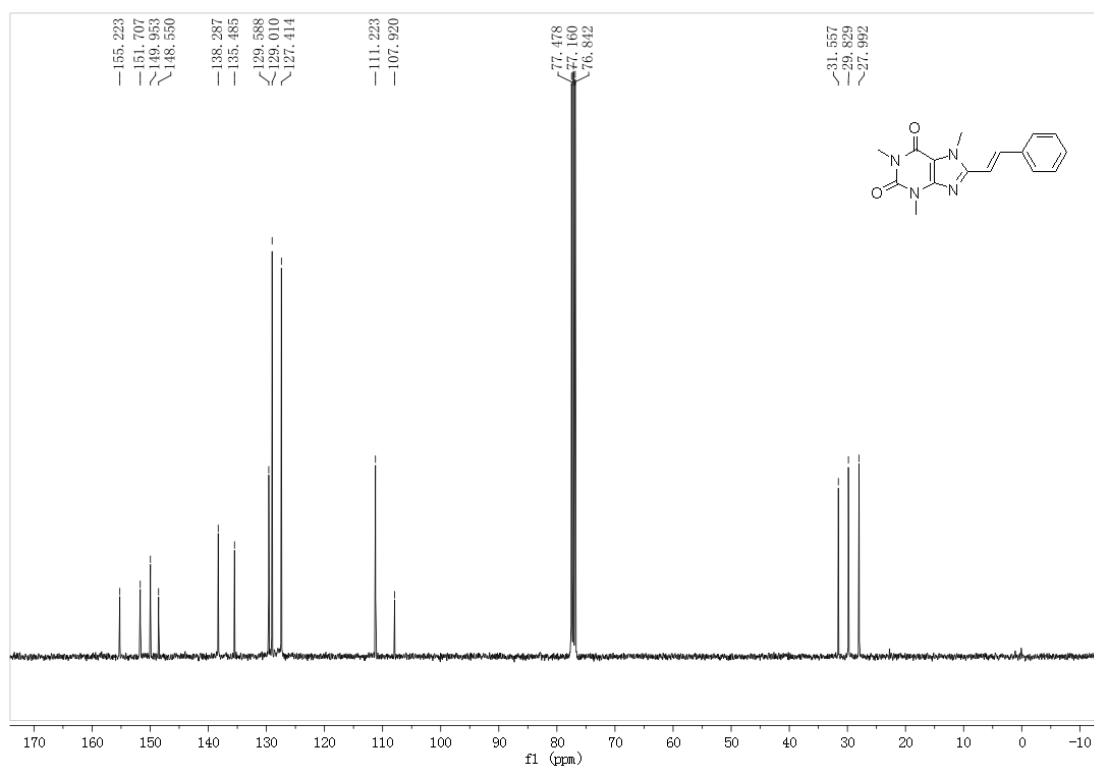

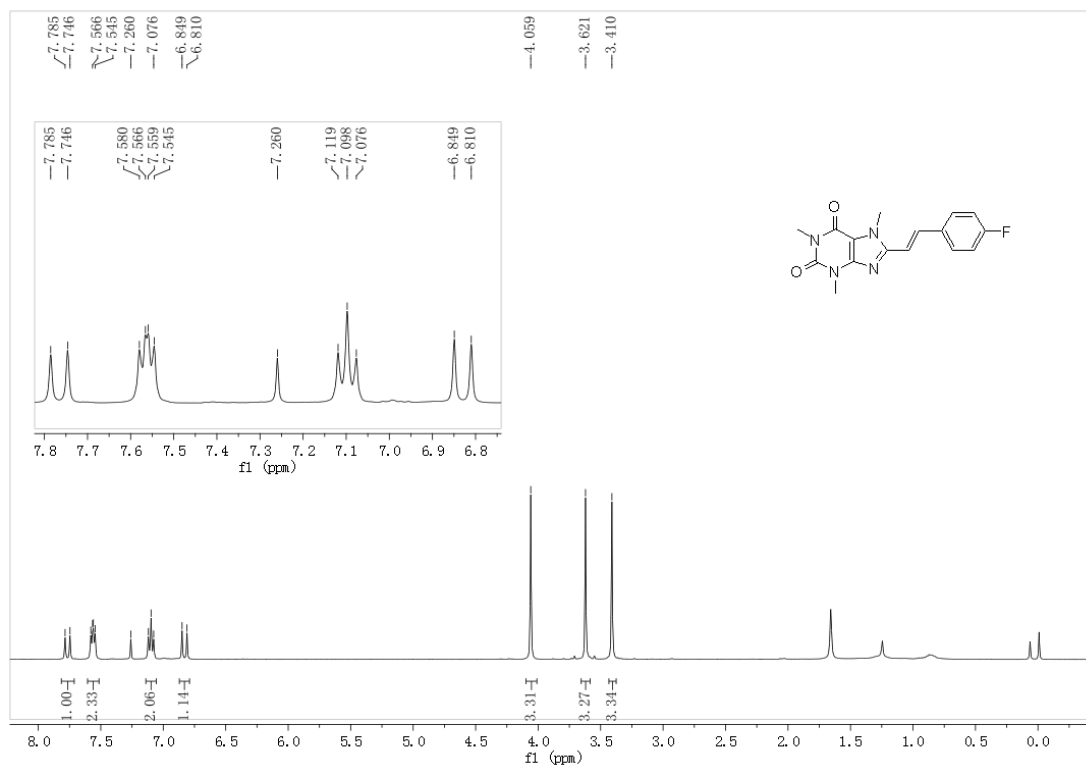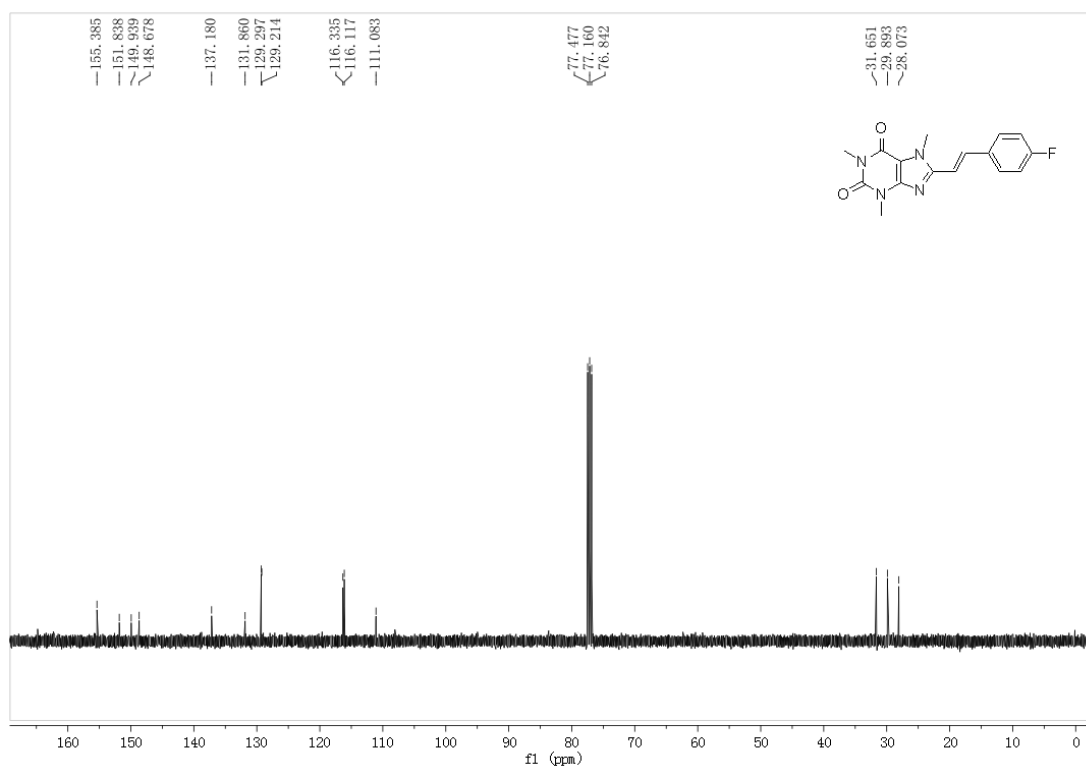

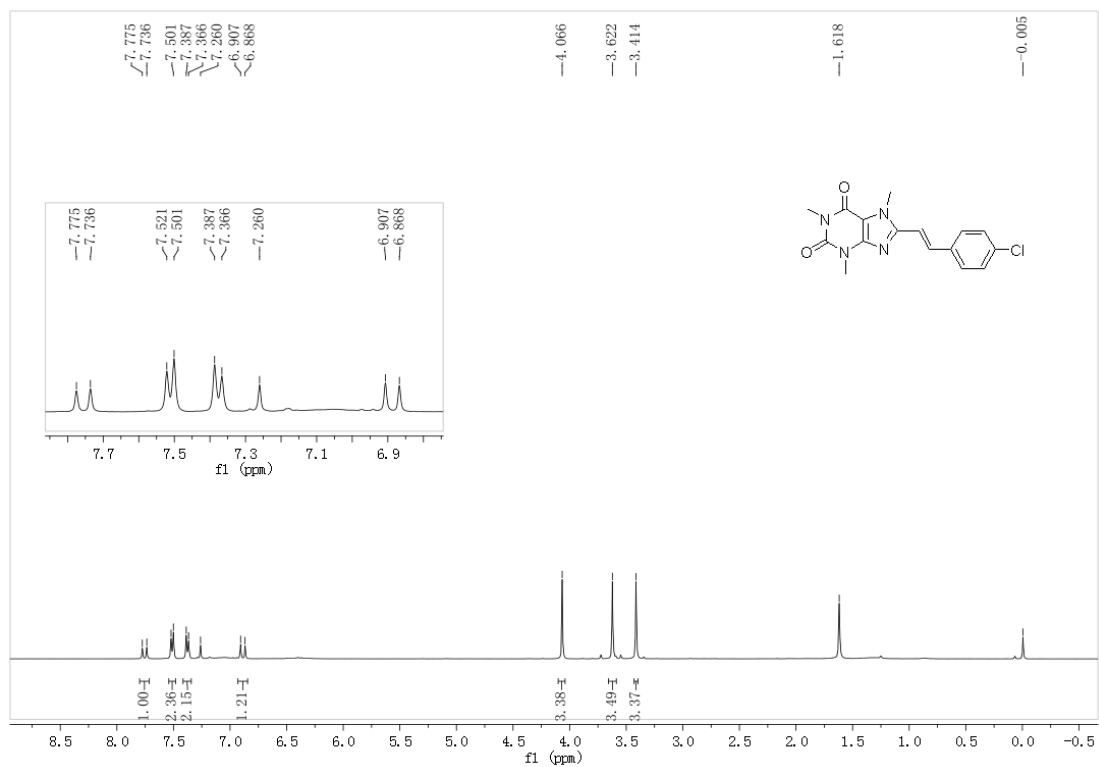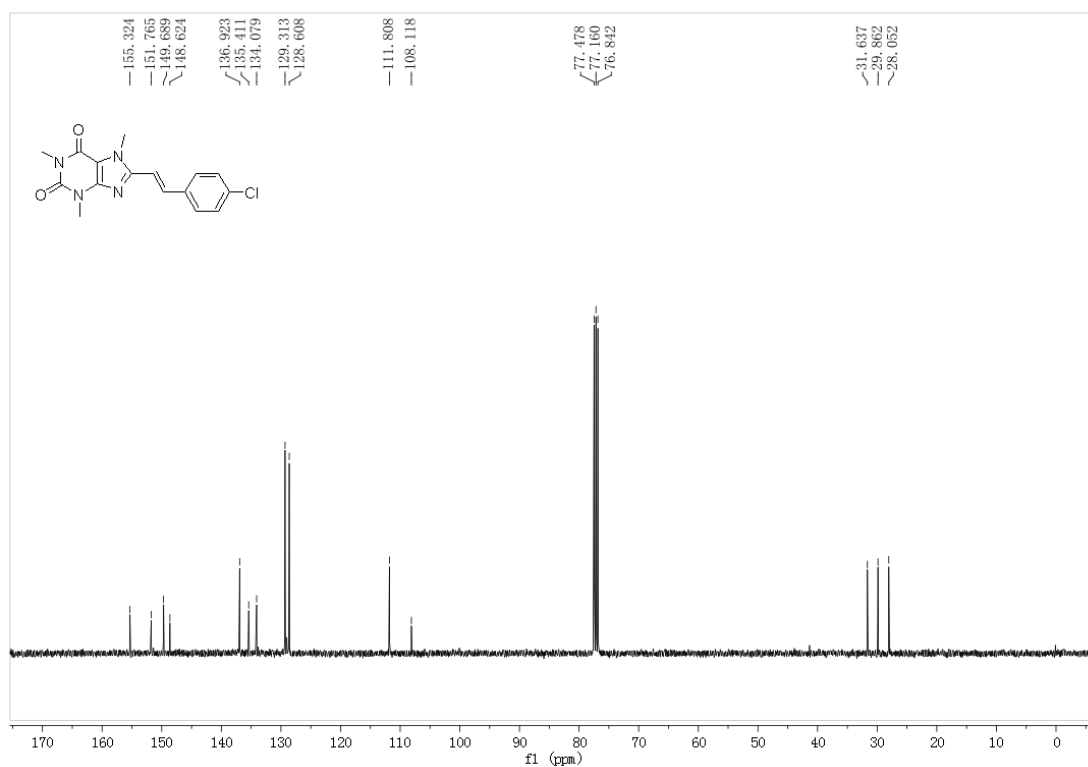

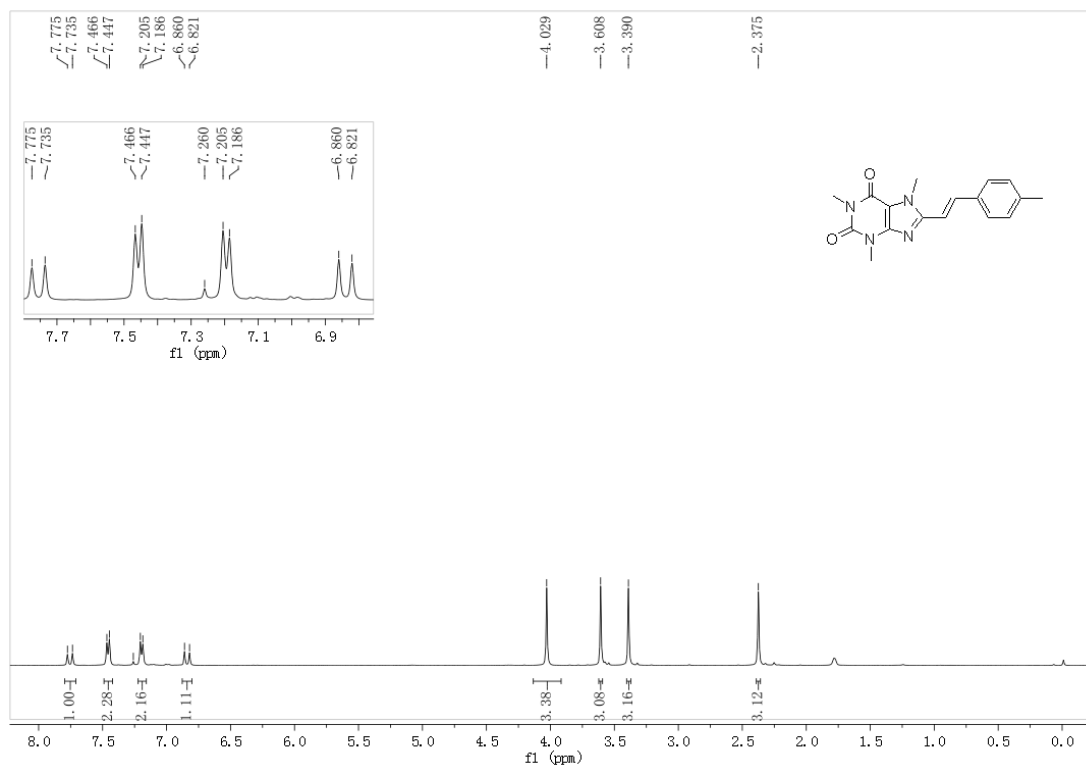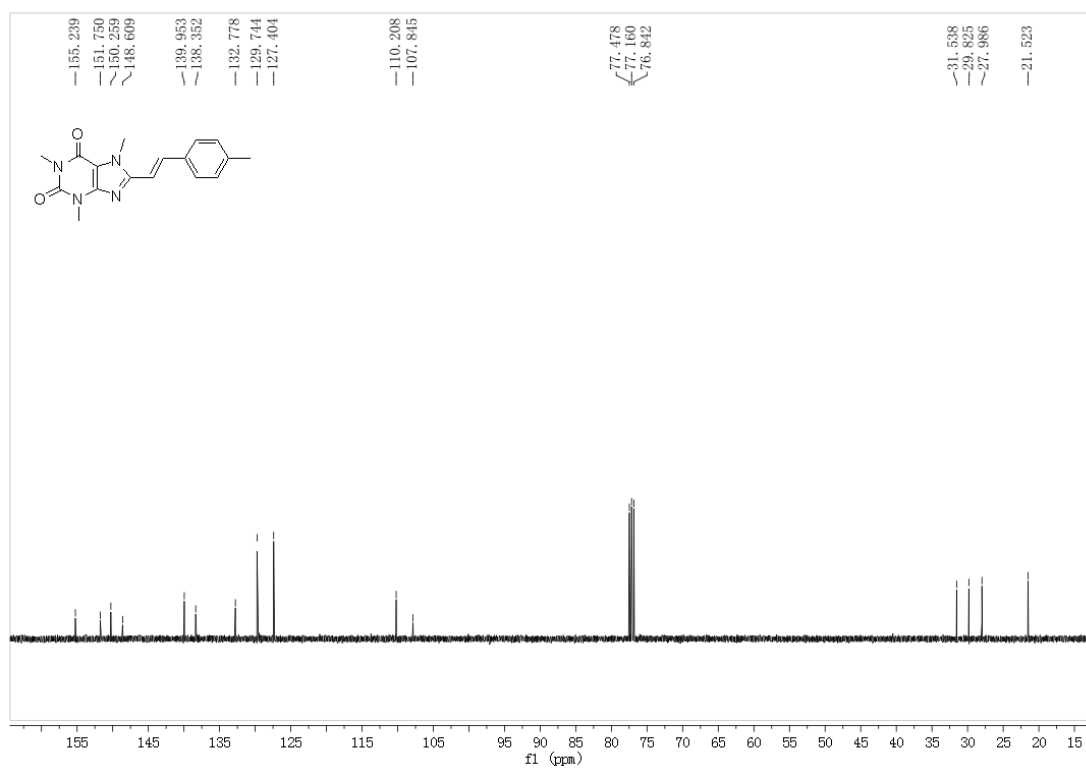

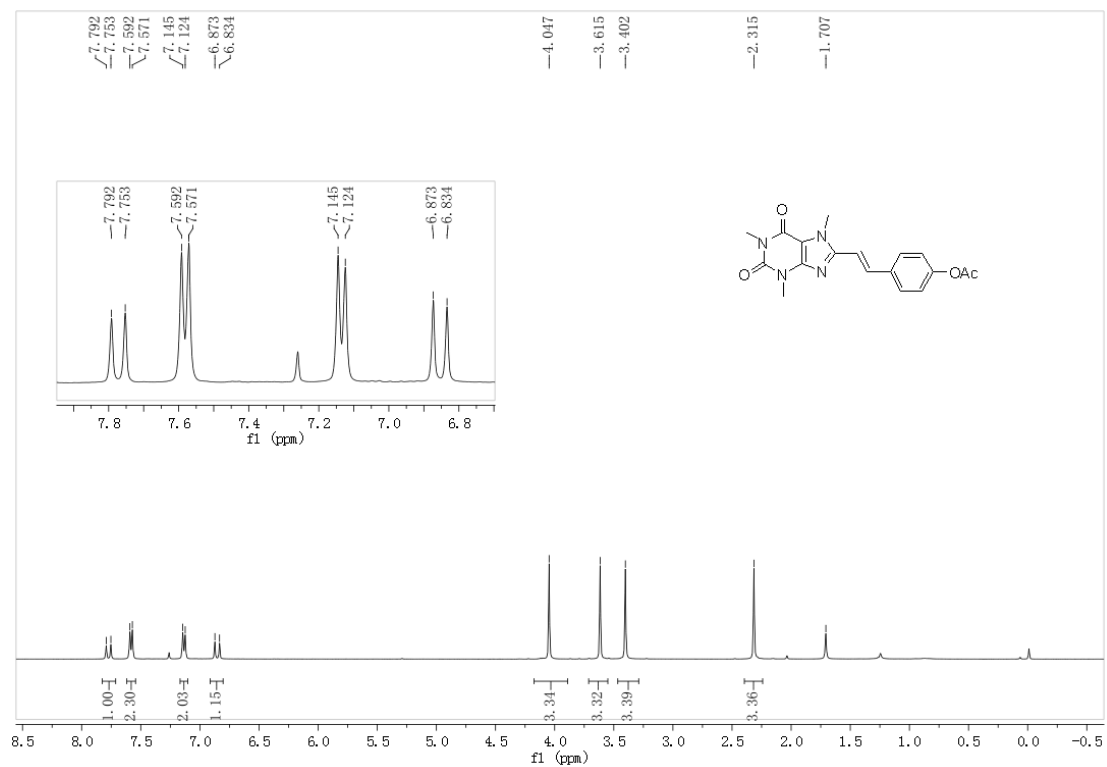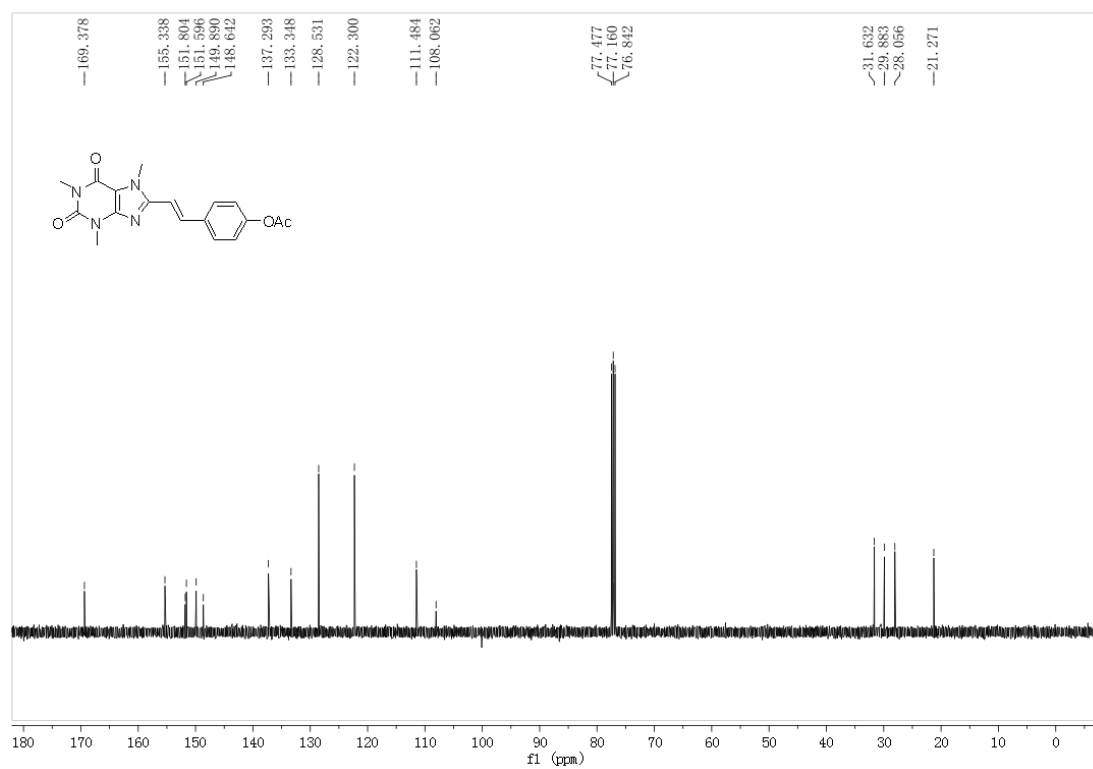

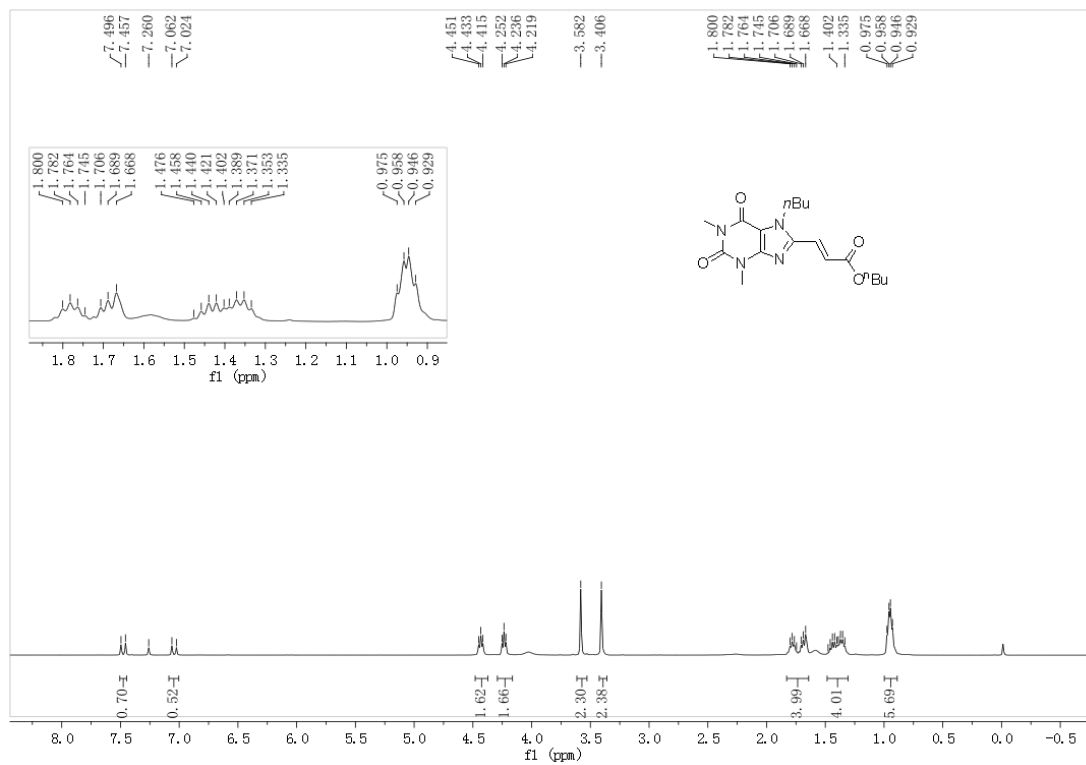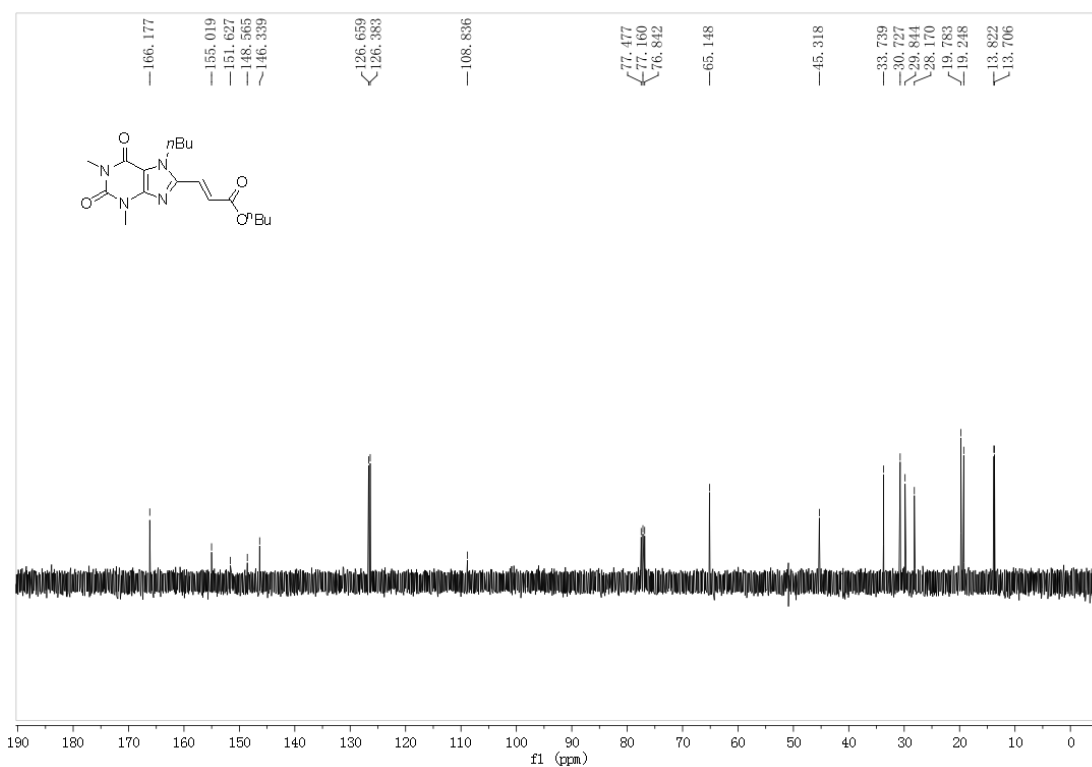



BNTB-CDCL3-H1-2009-1-7  
Pulse Sequence: s2pu1

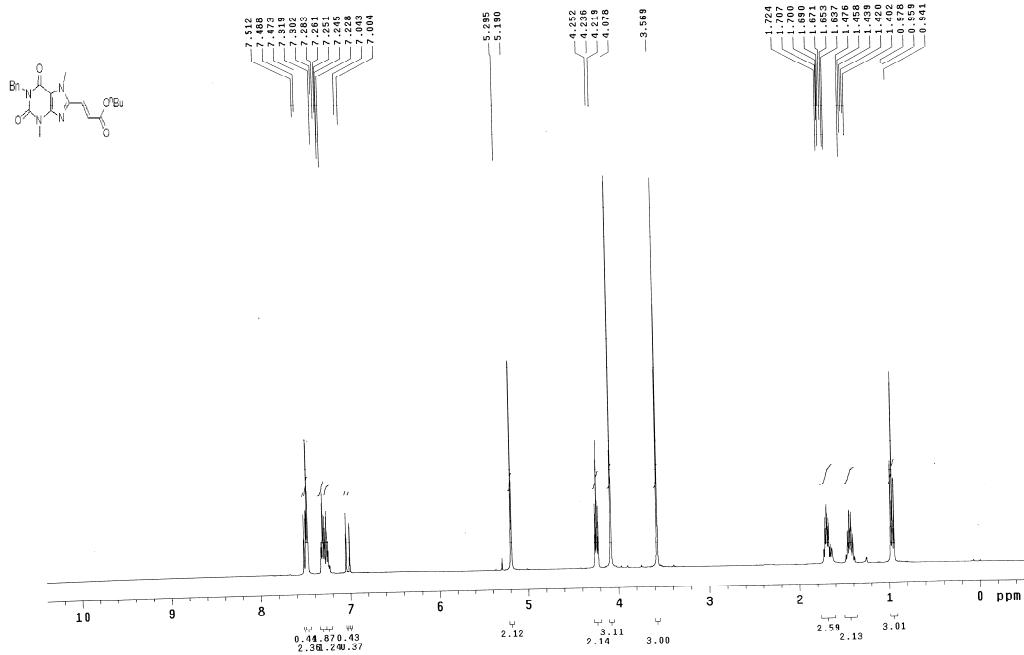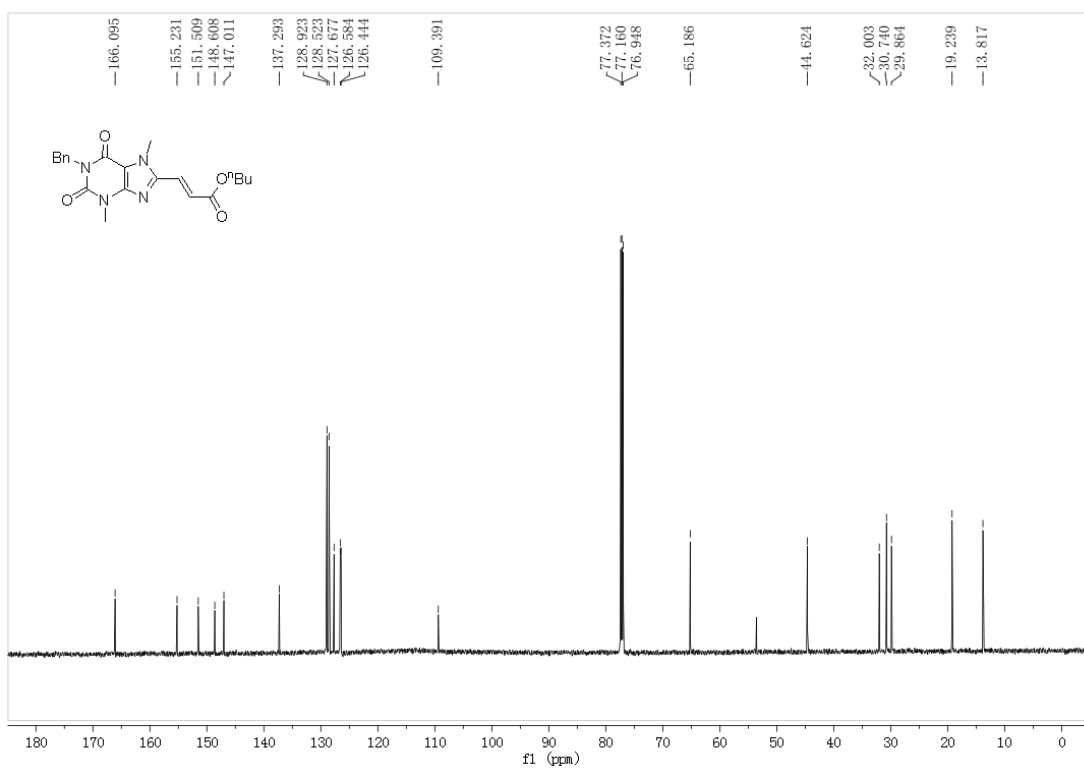

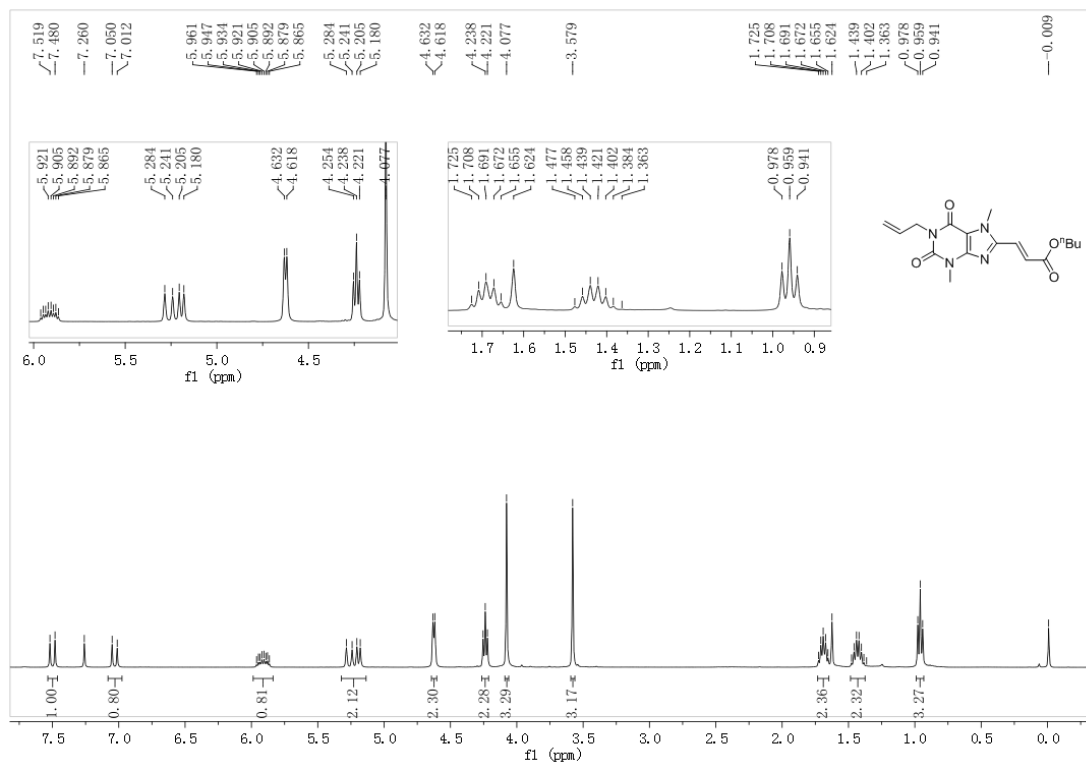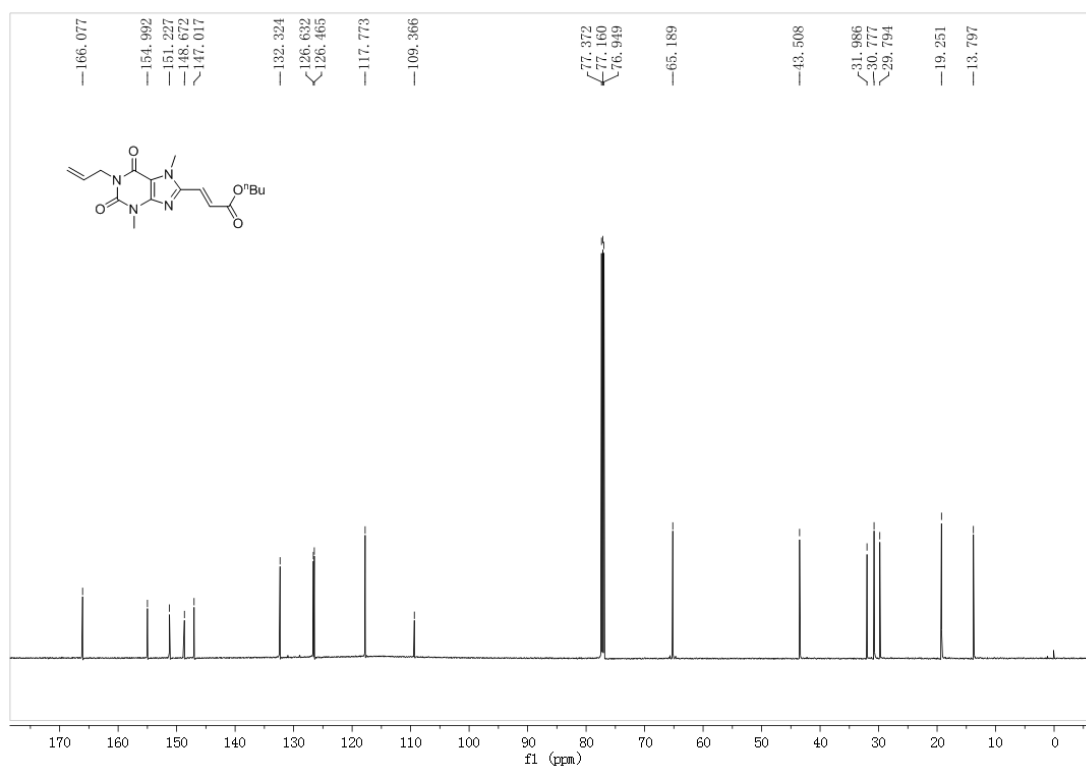

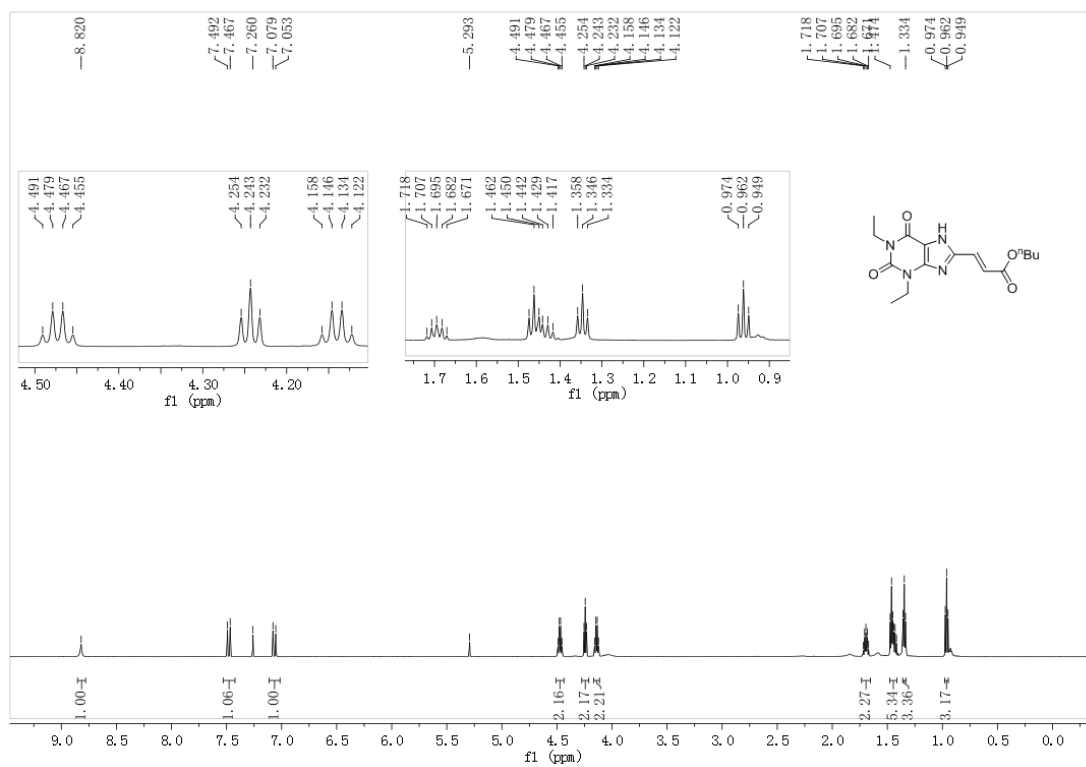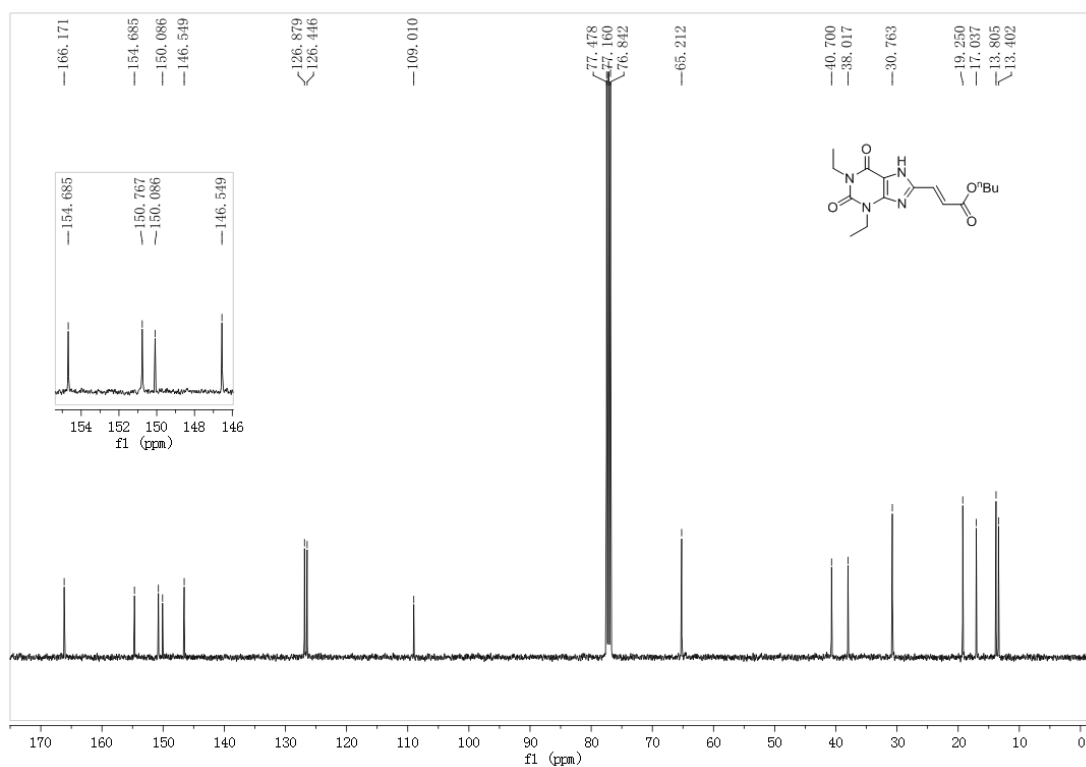

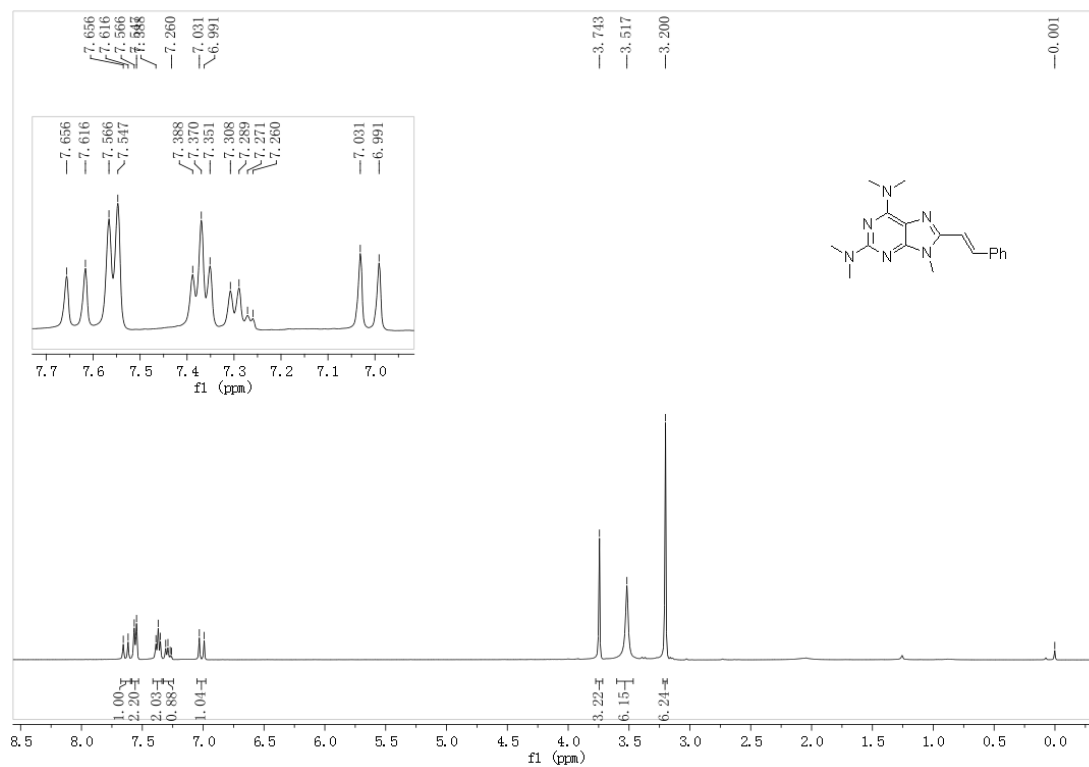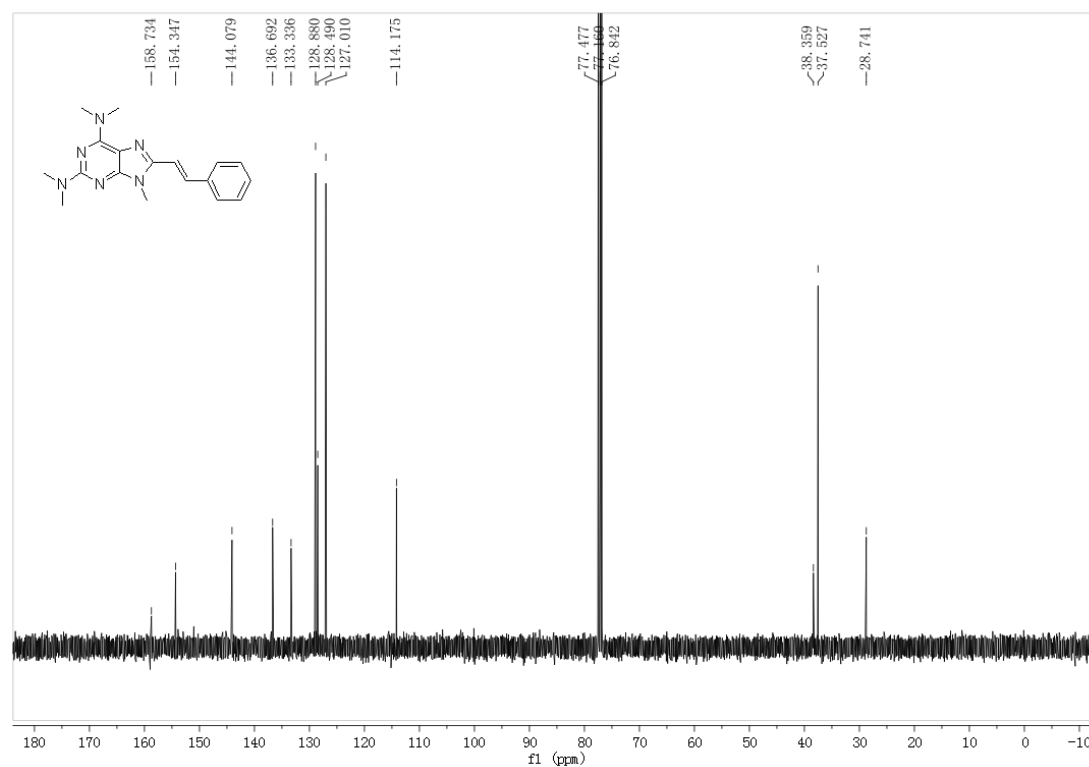

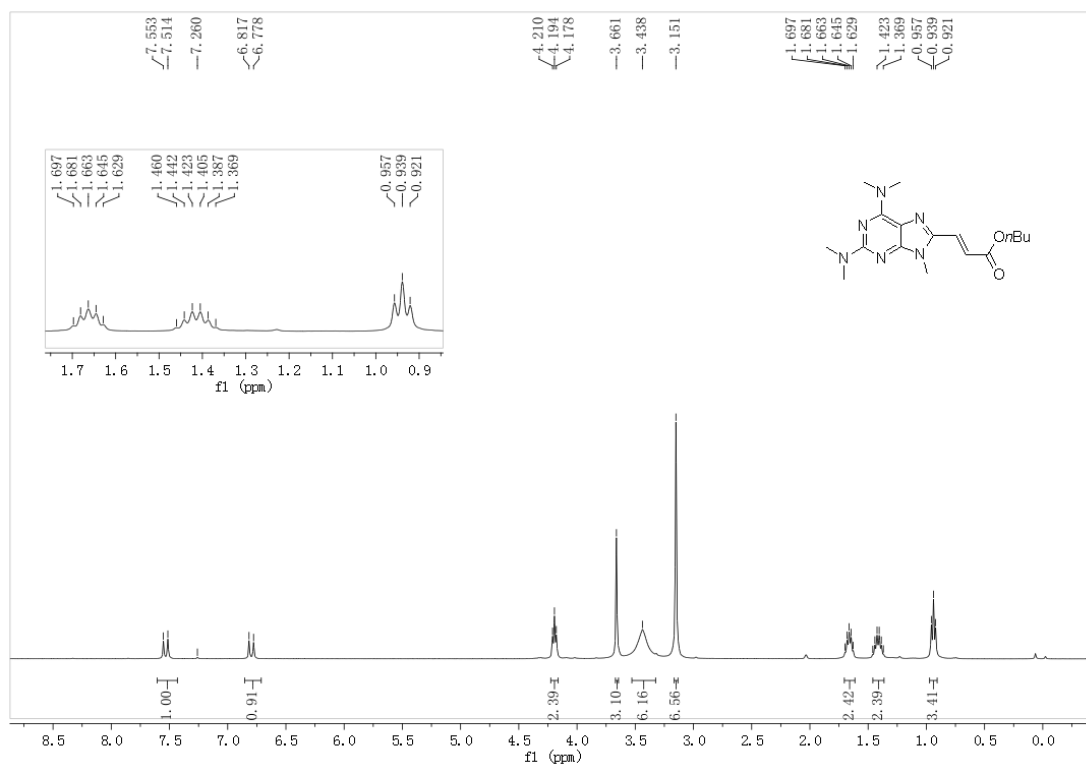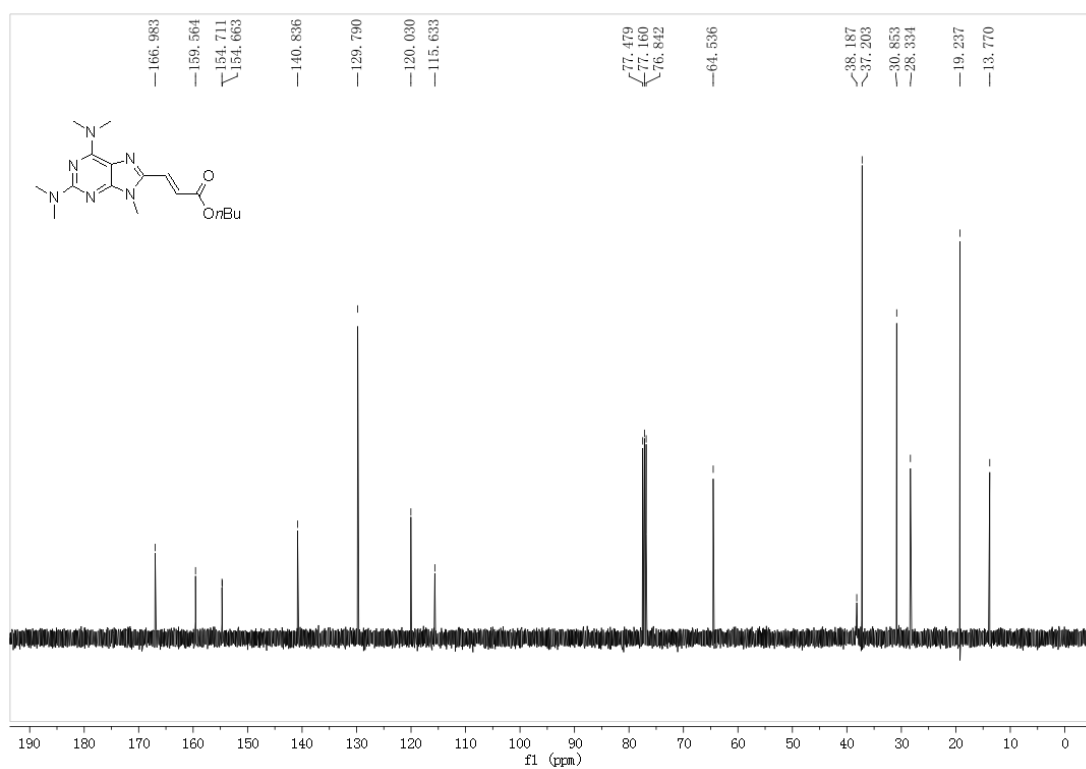

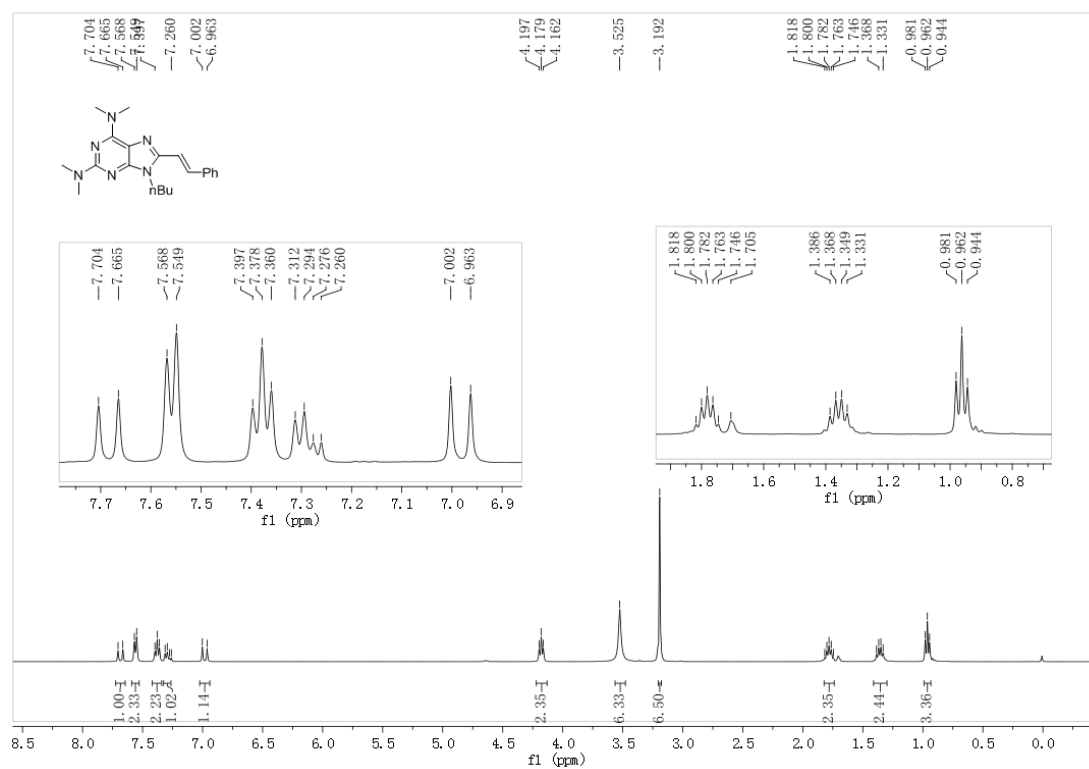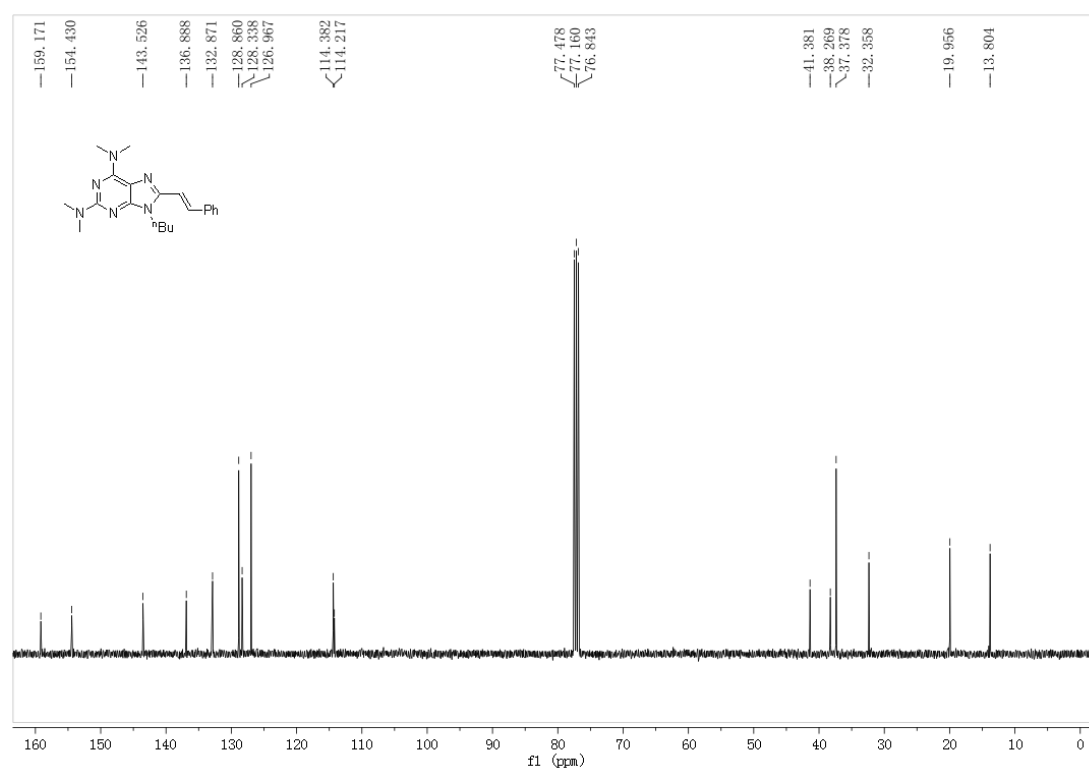

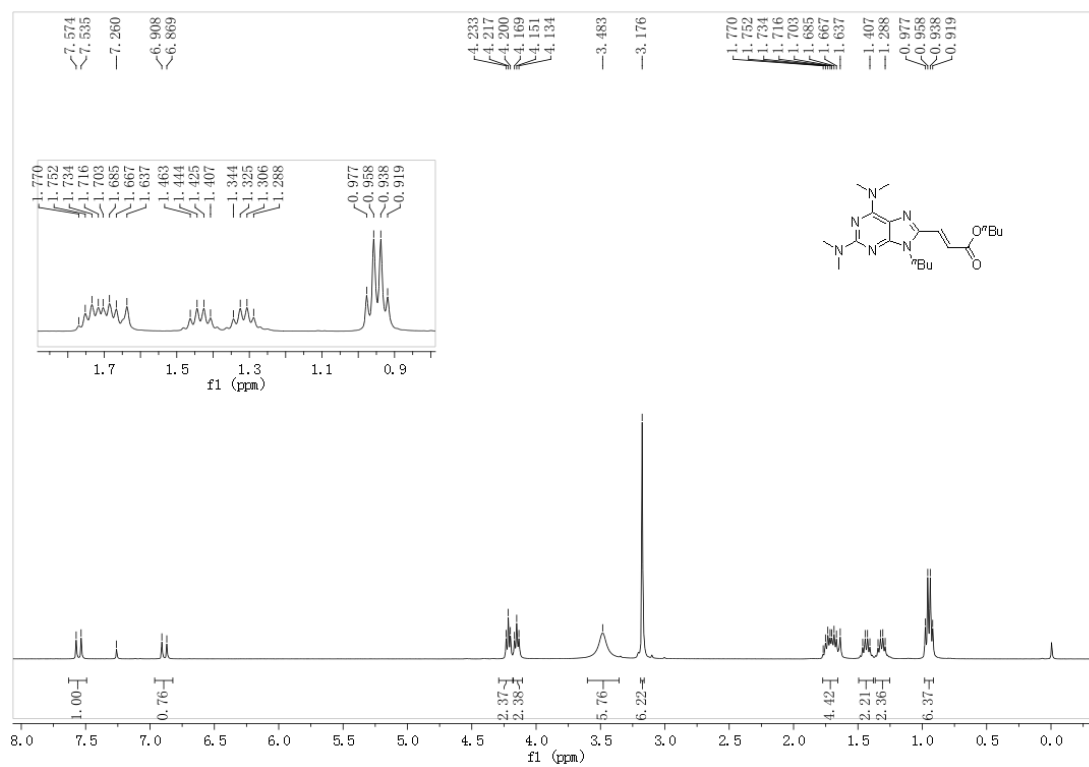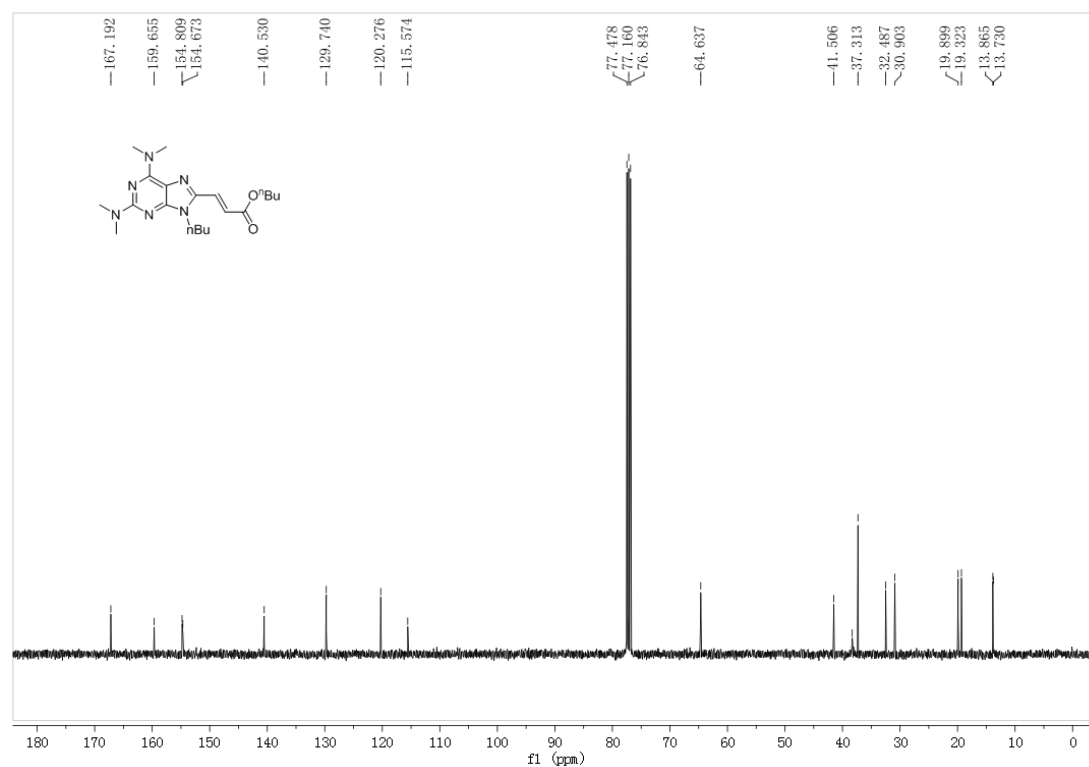

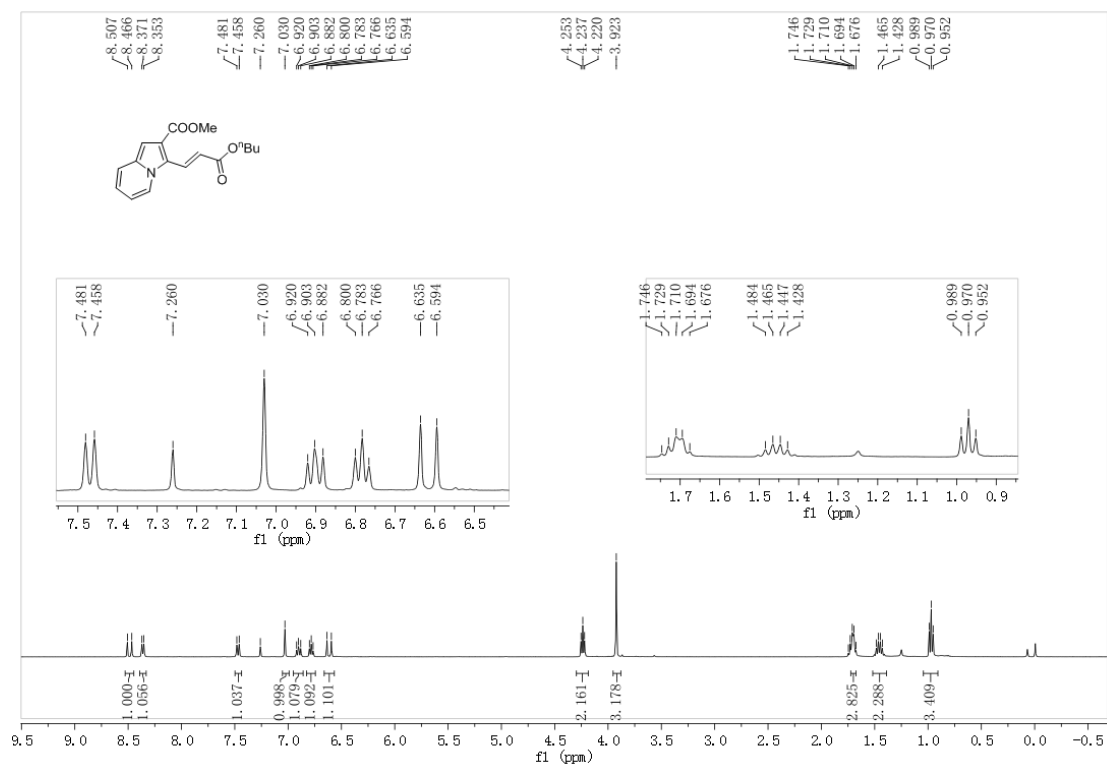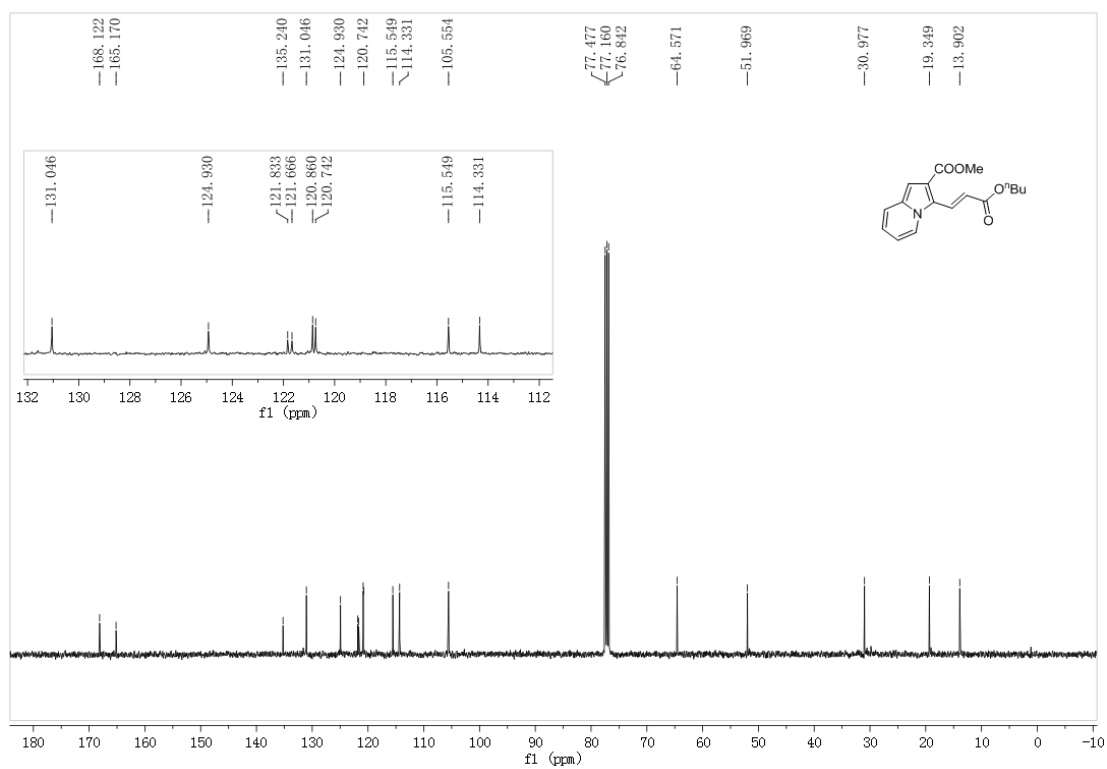



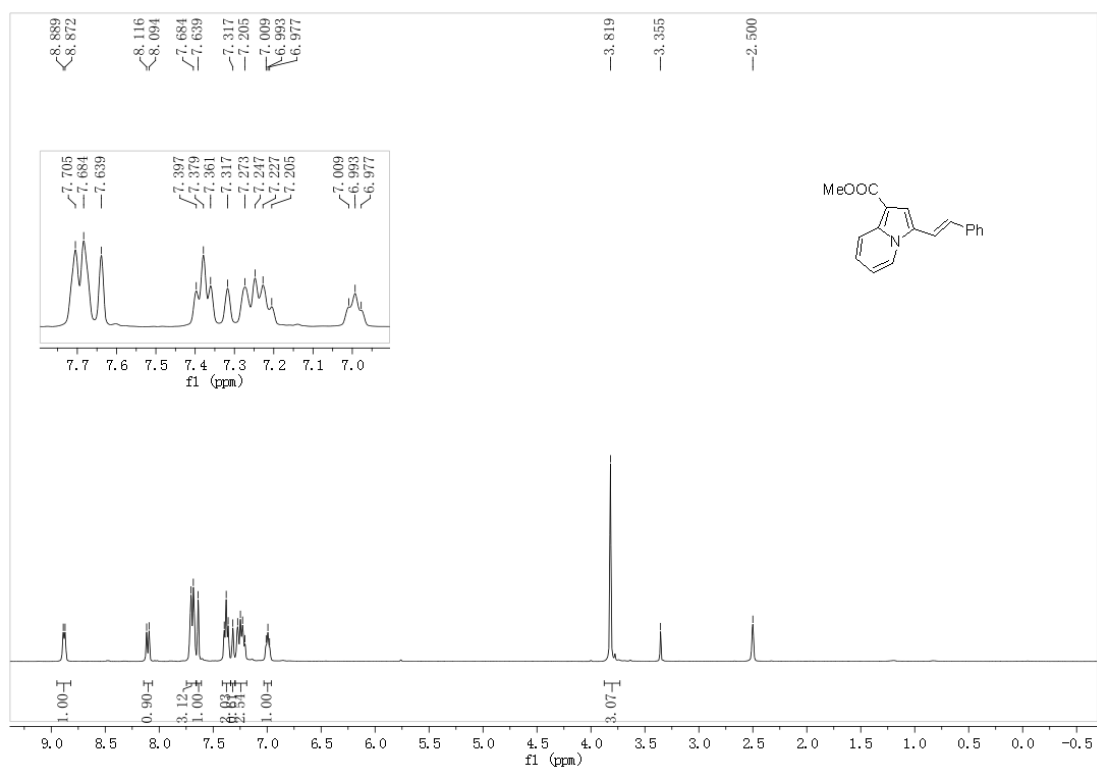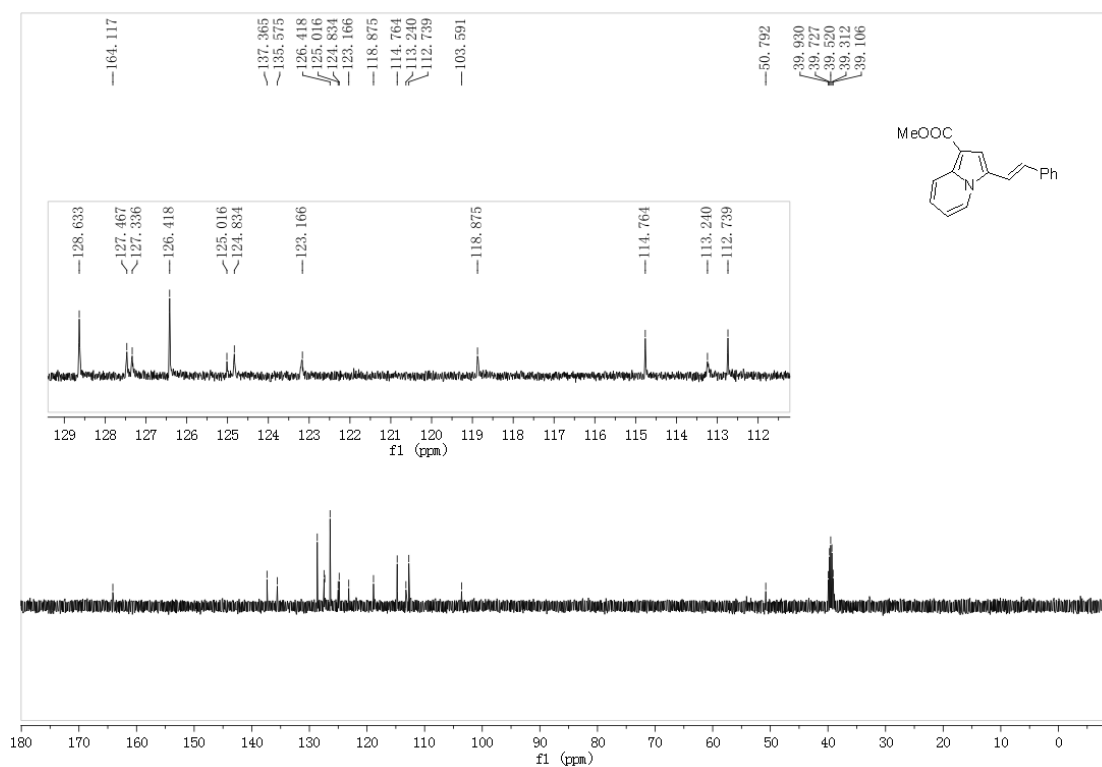

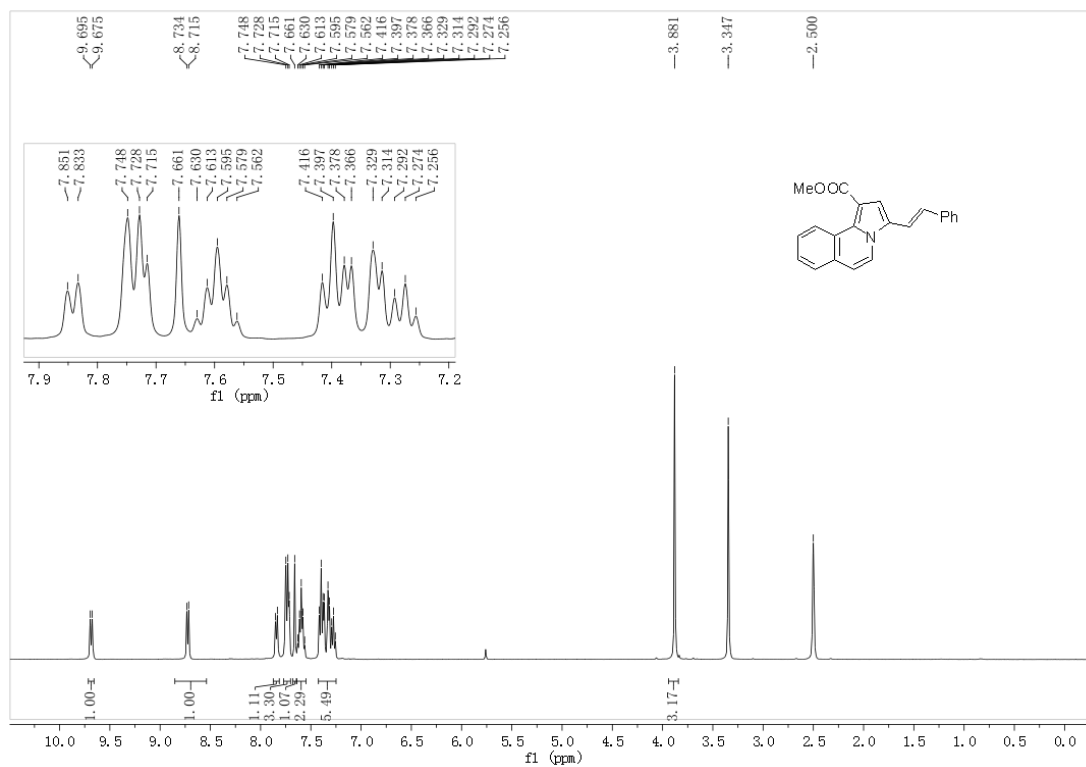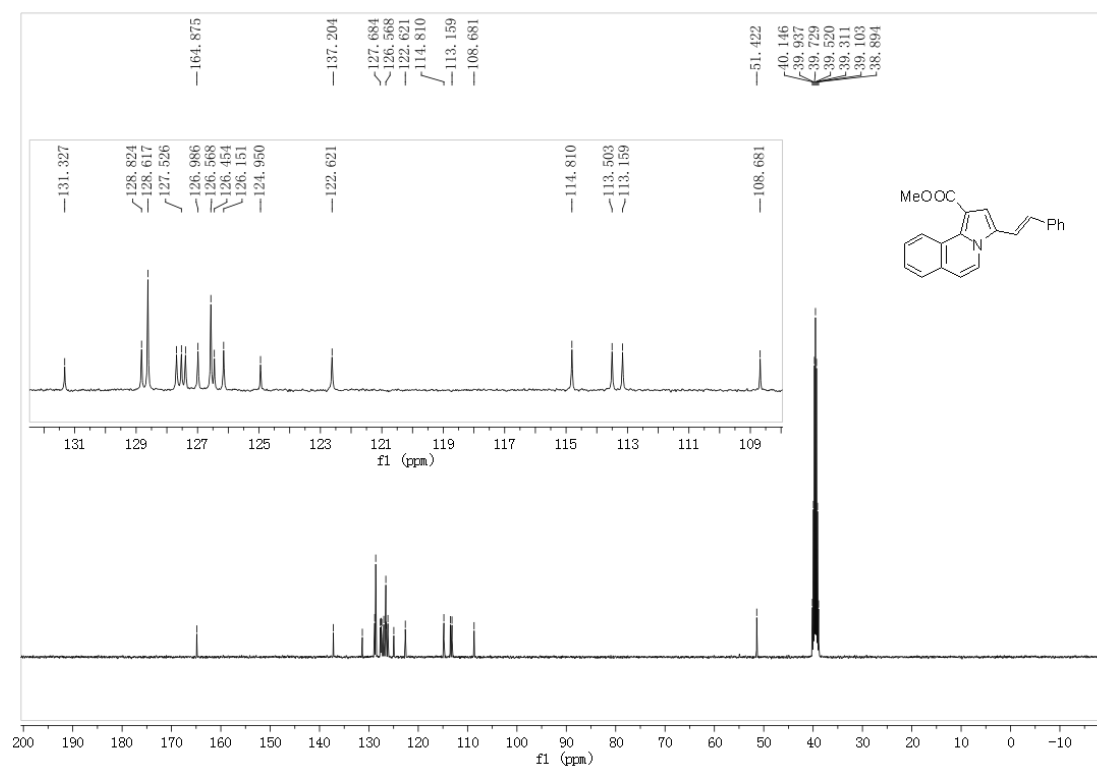

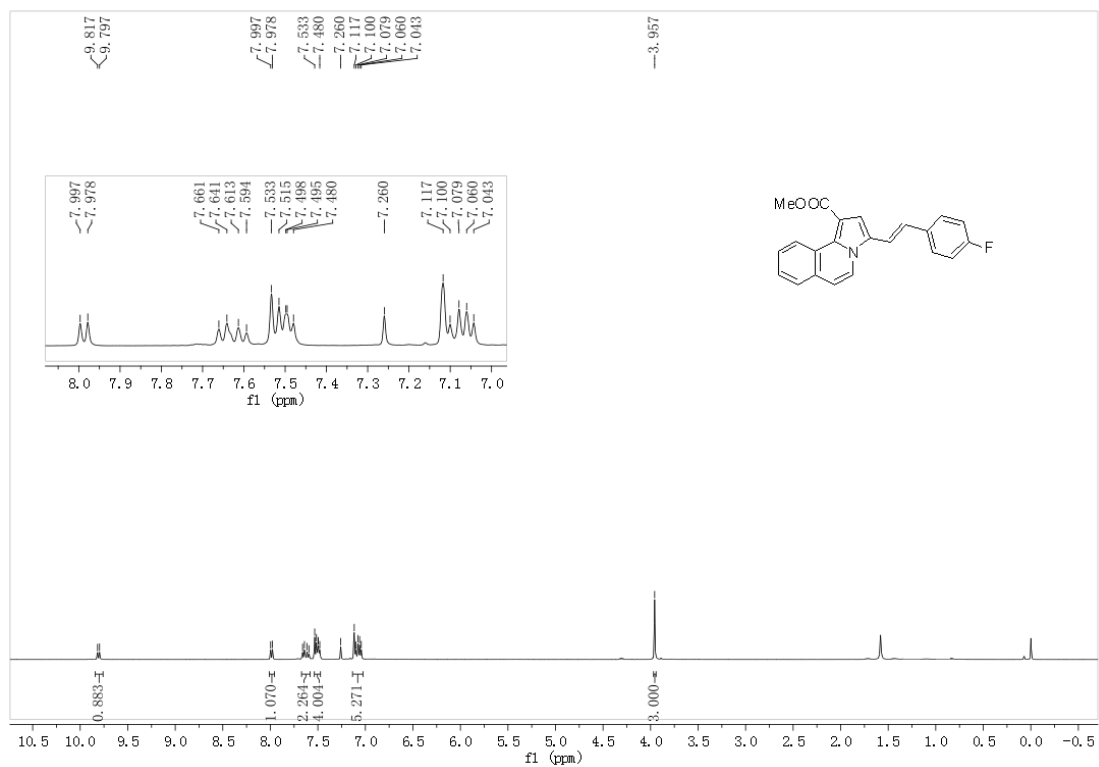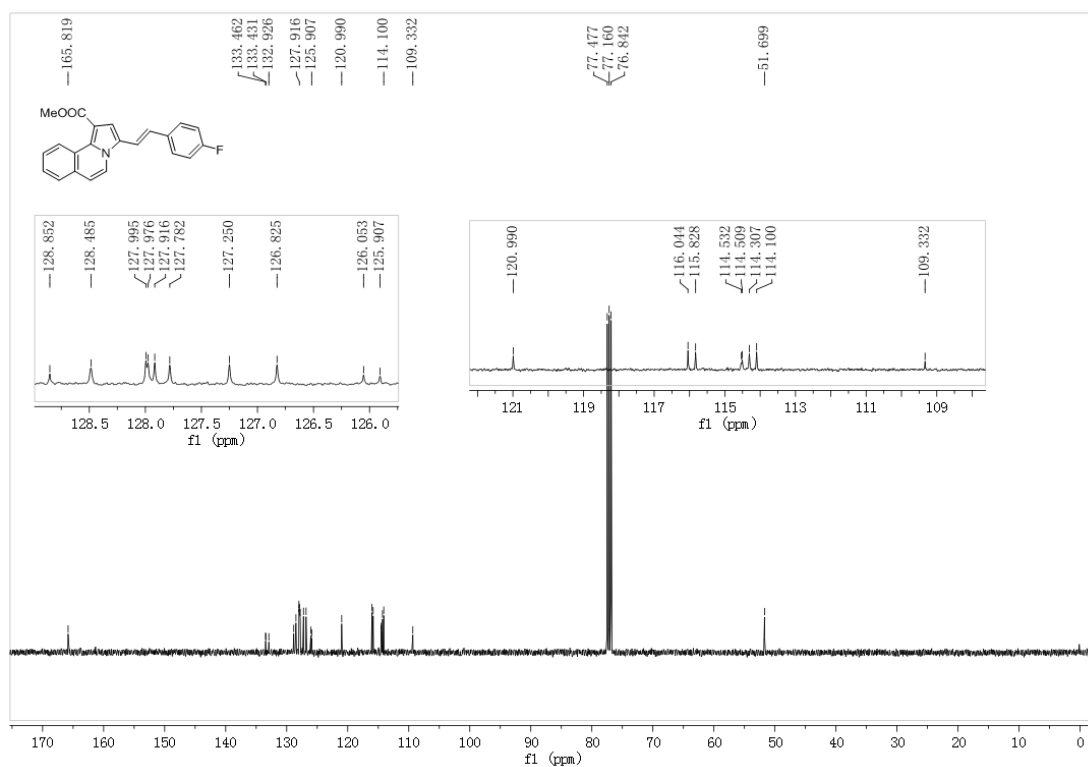

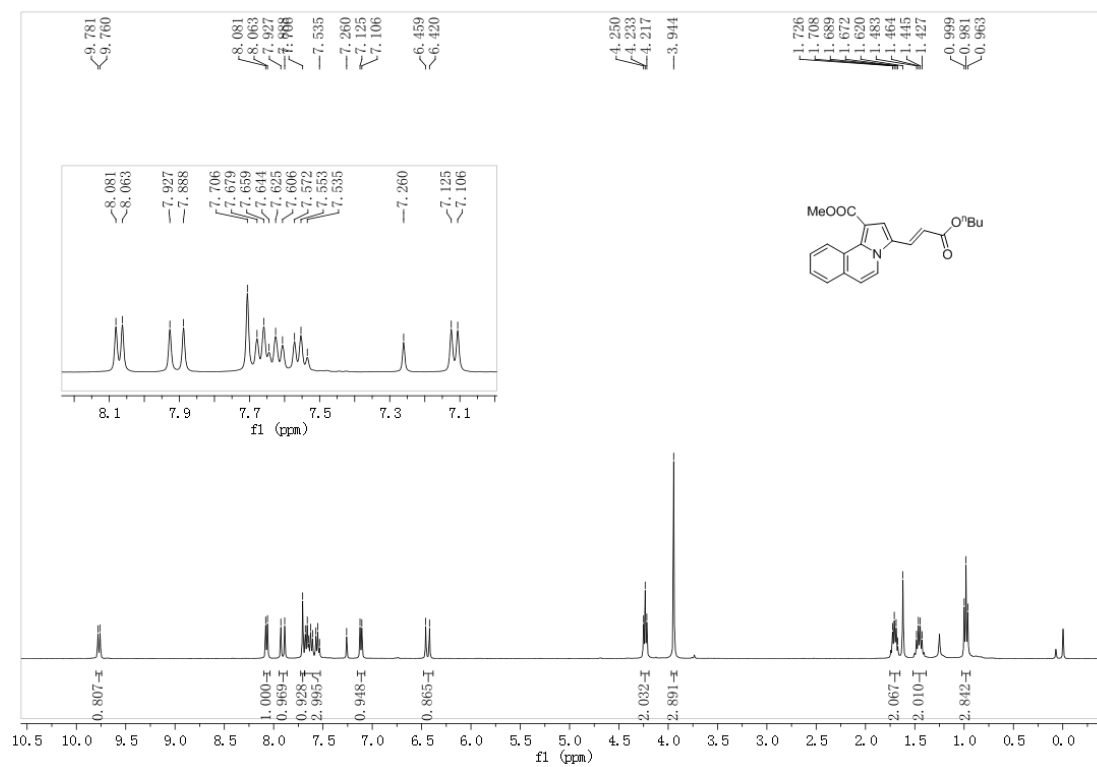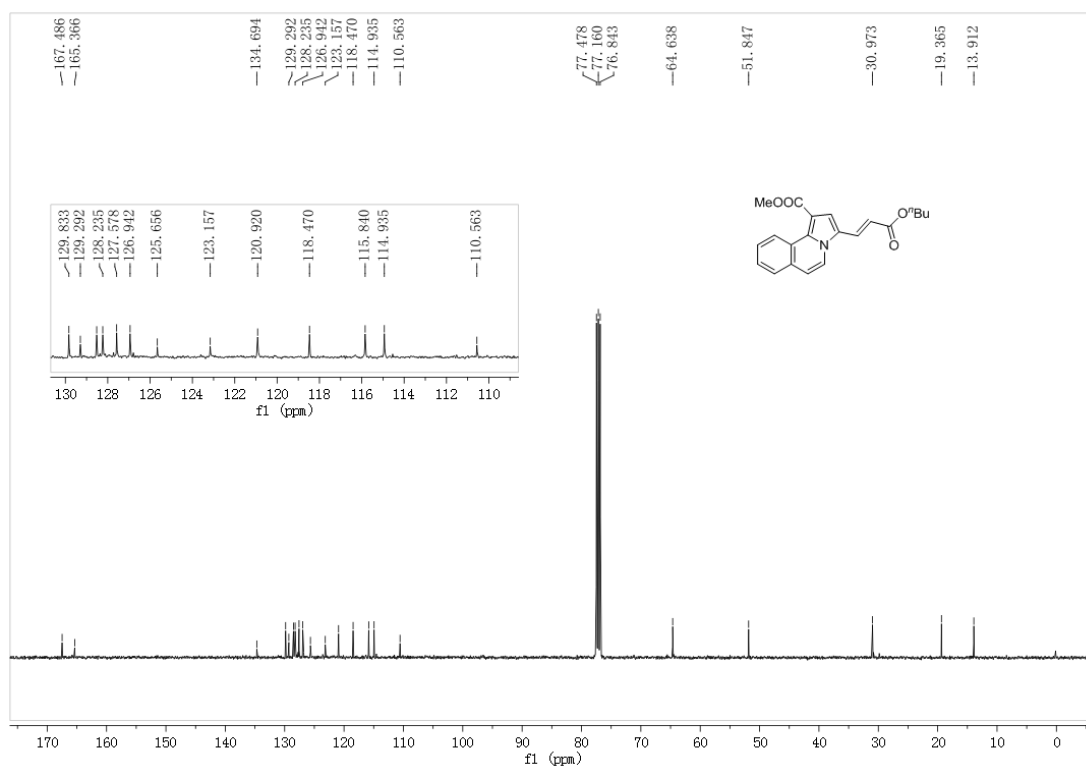

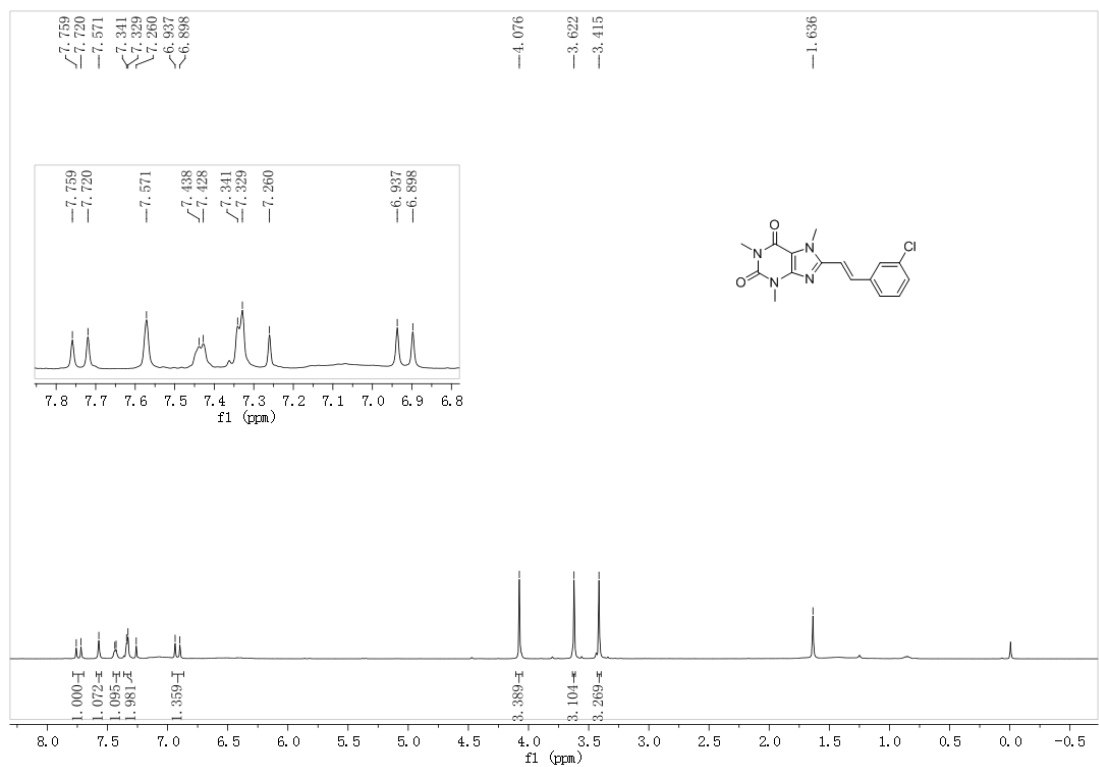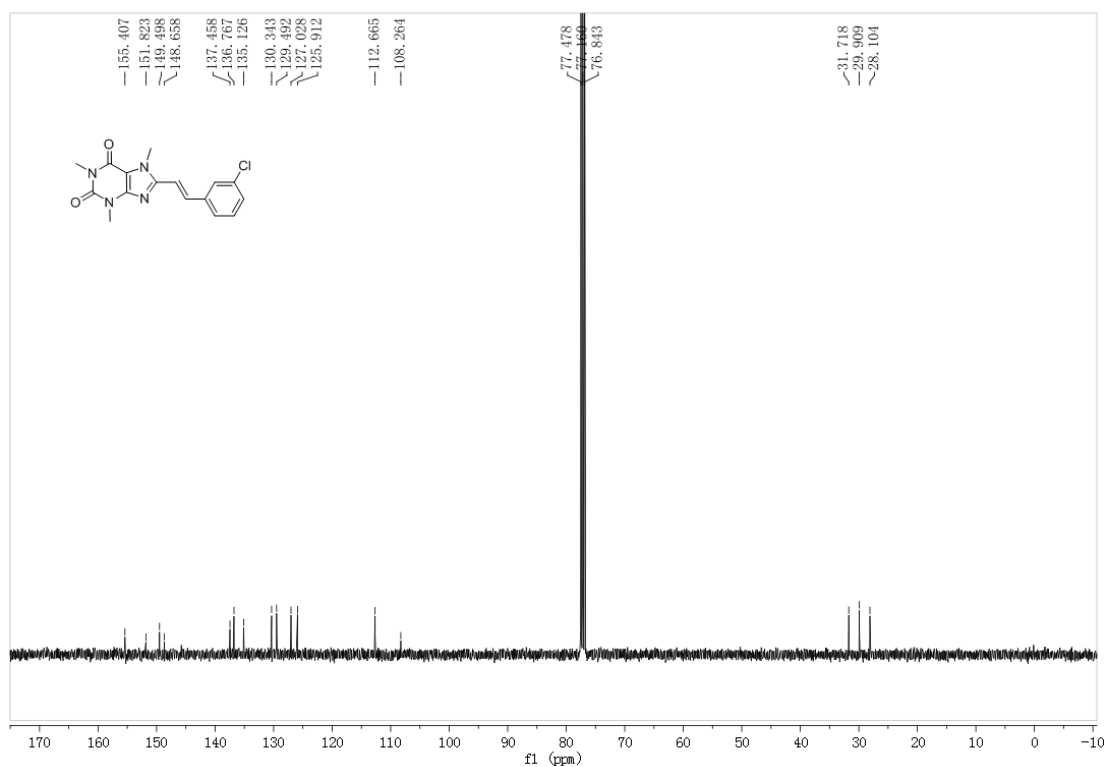

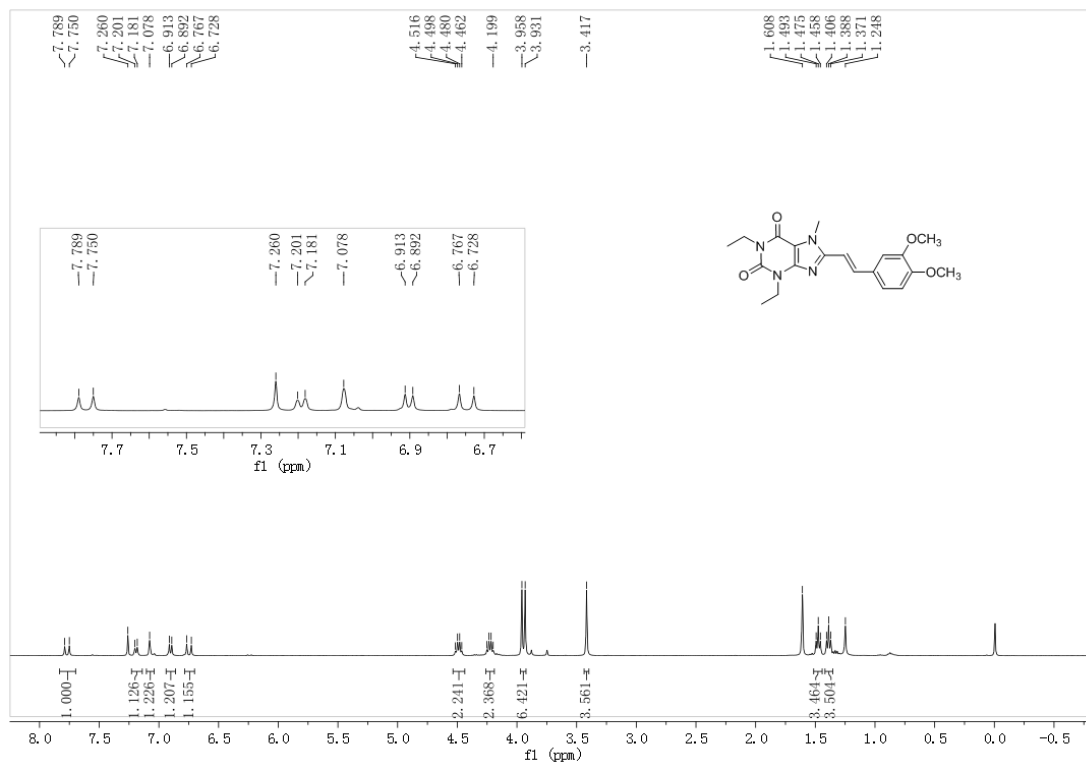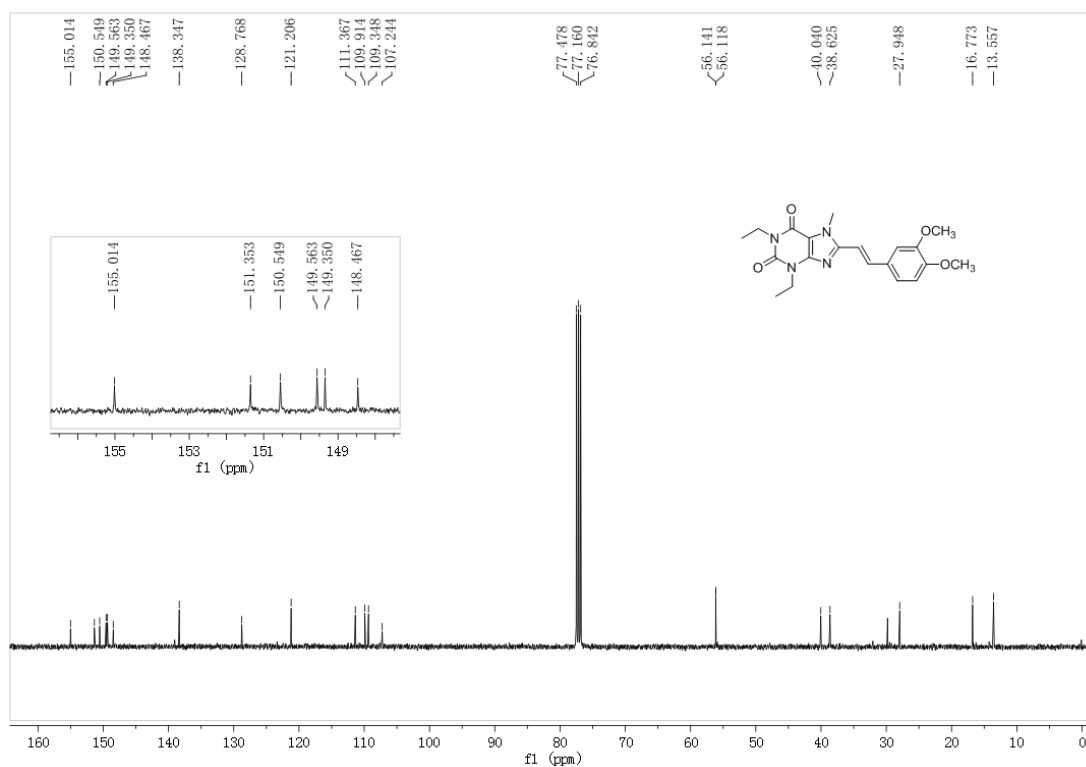

Supplement: c2cc17557f.pdf [file c2cc17557f.pdf]
